# Supplementary material for: Theoretical investigation of the chemoselectivity and synchronously pyrazole ring formation mechanism from ethoxymethylenemalononitrile and hydrazine hydrate in the gas and solvent phases: DFT, meta-GGA studies and NBO analysis
Source: Royal Society of Chemistry journal article supplement (doi:10.1039/c4ra06316c), 2014-01-01
Supplement: c4ra06316c1.pdf [file c4ra06316c1.pdf]

# Theoretical investigation of the chemoselectivity and synchronously pyrazole ring formation mechanism from ethoxymethylenemalononitrile and hydrazine hydrate in the gas and solvent phases: DFT study and NBO analysis

H. Sabet-Sarvestani, H. Eshghi, M. Bakavoli, M. Izadyar\* and M. Rahimizadeh

*Department of Chemistry, Faculty of Sciences, Ferdowsi University of Mashhad, Mashhad 91775- 1436, Iran.*

## **Supplementary Materials:**

---

\* Corresponding author. Tel/Fax: ++985118795457 e-mail: [izadyar@um.ac.ir](mailto:izadyar@um.ac.ir)

**Table 1(S).** total and relative energies of the intermediates and product in the gas phase at the B3LYP level.

| Species     | G+ZPE(a.u)  | $\Delta G_{rel}(\text{kcal.mol}^{-1})$ |
|-------------|-------------|----------------------------------------|
| R1+ R2      | -528.830156 | 0.0                                    |
| Inter1(r1)  | -528.824169 | 3.7                                    |
| Inter2(r1)  | -528.836878 | -4.2                                   |
| Inter3(r1)  | -528.851200 | -13.2                                  |
| Inter4 (r1) | -528.840290 | -6.4                                   |
| Inter5(r1)  | -528.850580 | -12.8                                  |
| Inter6 (r1) | -528.846665 | -10.4                                  |
| Inter7 (r1) | -528.849147 | -12.0                                  |
| Inter8 (r1) | -528.853725 | -14.8                                  |
| Inter9 (r1) | -528.889453 | -37.2                                  |
| Inter1(r2)  | -528.836937 | -4.3                                   |
| Inter3(r2)  | -528.845646 | -9.7                                   |
| P           | -528.893283 | -39.6                                  |

**Table 2(S).** Total energies, Gibbs free energy of activation and imaginary vibrational frequencies of the TSs for two routes in the gas phase at B3LYP level.

| Species  | G+ZPVE(a.u) | $\Delta G^\ddagger (\text{kcal.mol}^{-1})$ | $\nu (\text{icm}^{-1})$ |
|----------|-------------|--------------------------------------------|-------------------------|
| TS1(r1)  | -528.765749 | 40.4                                       | 1626.97                 |
| TS2(r1)  | -528.731181 | 58.4                                       | 1828.36                 |
| TS3(r1)  | -528.770874 | 33.5                                       | 1632.90                 |
| TS4(r1)  | -528.750637 | 46.2                                       | 362.49                  |
| TS5(r1)  | -528.735545 | 72.6                                       | 1899.13                 |
| TS6(r1)  | -528.735065 | 66.1                                       | 1804.92                 |
| TS7(r1)  | -528.762978 | 46.4                                       | 1235.94                 |
| TS8(r1)  | -528.742807 | 59.0                                       | 1926.70                 |
| TS9(r1)  | -528.758905 | 48.9                                       | 1929.37                 |
| TS10(r1) | -528.764993 | 45.1                                       | 1658.66                 |
| TS11(r1) | -528.759509 | 54.7                                       | 2061.02                 |
| TS12(r1) | -528.804212 | 31.1                                       | 235.23                  |
| TS13(r1) | -528.796419 | 33.2                                       | 1331.40                 |
| TS14(r1) | -528.793264 | 35.9                                       | 1887.33                 |
| TS15(r1) | -528.817730 | 45.0                                       | 1746.91                 |
| TS1(r2)  | -528.742583 | 55.0                                       | 1734.26                 |
| TS2(r2)  | -528.742321 | 59.4                                       | 1596.37                 |
| TS3(r2)  | -528.773284 | 39.9                                       | 1872.20                 |
| TS8(r2)  | -528.773592 | 45.2                                       | 1640.26                 |

**Table 3(S).** ZPVE-corrected total energies and relative Gibbs free energies of the intermediates and product in methanol at the B3LYP level.

| Species     | G+ZPE(a.u)  | $\Delta G_{rel}$ (kcal.mol <sup>-1</sup> ) |
|-------------|-------------|--------------------------------------------|
| R1+ R2      | -528.860659 | 0.0                                        |
| Inter1(r1)  | -528.840037 | 12.9                                       |
| Inter2(r1)  | -528.852658 | 5.0                                        |
| Inter3(r1)  | -528.872398 | -7.4                                       |
| Inter4(r1)  | -528.857016 | 2.3                                        |
| Inter5 (r1) | -528.877371 | -10.5                                      |
| Inter6 (r1) | -528.87035  | -6.1                                       |
| Inter7 (r1) | -528.865562 | -3.1                                       |
| Inter8(r1)  | -528.865219 | -2.9                                       |
| Inter9(r1)  | -528.913203 | -31.3                                      |
| Inter1(r2)  | -528.860508 | 0.1                                        |
| Inter3(r2)  | -528.863955 | -2.1                                       |
| P           | -528.910477 | -33.0                                      |

**Table 4(S).** Total energies and Gibbs free energies of activation of the TSs for two routes in methanol at the B3LYP level.

| Species  | G+ZPE(a.u)  | $\Delta G^\ddagger$ (kcal.mol <sup>-1</sup> ) |
|----------|-------------|-----------------------------------------------|
| TS1(r1)  | -528.790398 | 44.1                                          |
| TS2(r1)  | -528.752467 | 54.9                                          |
| TS3(r1)  | -528.790537 | 31.1                                          |
| TS4(r1)  | -528.771314 | 43.2                                          |
| TS5(r1)  | -528.766199 | 66.7                                          |
| TS6(r1)  | -528.757847 | 62.2                                          |
| TS7(r1)  | -528.782438 | 44.1                                          |
| TS8(r1)  | -528.763072 | 56.2                                          |
| TS9(r1)  | -528.774113 | 49.3                                          |
| TS10(r1) | -528.860659 | 38.4                                          |
| TS11(r1) | -528.78088  | 56.2                                          |
| TS12(r1) | -528.833122 | 20.2                                          |
| TS13(r1) | -528.817178 | 30.4                                          |
| TS14(r1) | -528.809995 | 42.3                                          |
| TS15(r1) | -528.832427 | 49.0                                          |
| TS1(r2)  | -528.770763 | 56.4                                          |
| TS2(r2)  | -528.774001 | 54.3                                          |
| TS3(r2)  | -528.791003 | 43.7                                          |
| TS8(r2)  | -528.793112 | 44.5                                          |

**Table 5(S).** Total energies and relative energy of intermediates and product in the gas phase at the MPWB95 level.

| Species     | E+ZPE(a.u)   | $\Delta E_{\text{rel}}(\text{kcal.mol}^{-1})$ |
|-------------|--------------|-----------------------------------------------|
| R1+ R2      | -528.6513091 | 0.0                                           |
| Inter1(r1)  | -528.6655019 | -8.9                                          |
| Inter2(r1)  | -528.6891967 | -23.8                                         |
| Inter3(r1)  | -528.6675917 | -10.2                                         |
| Inter4 (r1) | -528.661104  | -6.1                                          |
| Inter5(r1)  | -528.6851823 | -21.3                                         |
| Inter6 (r1) | -528.6754903 | -15.2                                         |
| Inter7 (r1) | -528.7035616 | -32.8                                         |
| Inter8 (r1) | -528.6991209 | -30.0                                         |
| Inter9 (r1) | -528.7211358 | -43.8                                         |
| Inter1(r2)  | -528.6772109 | -16.2                                         |
| Inter3(r2)  | -528.845646  | -20.1                                         |
| P           | -528.7302076 | -49.5                                         |

**Table 6(S).** Total energies and relative energy of activation of the TSs for two main pathways in the gas phase at the MPWB95 level.

| Species  | E+ZPVE(a.u)  | $\Delta E^{\ddagger} (\text{kcal.mol}^{-1})$ |
|----------|--------------|----------------------------------------------|
| TS1(r1)  | -528.6027558 | 30.5                                         |
| TS2(r1)  | -528.5744847 | 57.1                                         |
| TS3(r1)  | -528.770874  | 42.9                                         |
| TS4(r1)  | -528.5744847 | 60.3                                         |
| TS5(r1)  | -528.5632684 | 65.4                                         |
| TS6(r1)  | -528.5613961 | 62.5                                         |
| TS7(r1)  | -528.592655  | 60.6                                         |
| TS8(r1)  | -528.5904419 | 62.0                                         |
| TS9(r1)  | -528.6049544 | 52.9                                         |
| TS10(r1) | -528.5632684 | 79.0                                         |
| TS11(r1) | -528.58878   | 54.4                                         |
| TS12(r1) | -528.6404487 | 36.8                                         |
| TS13(r1) | -528.6305036 | 45.9                                         |
| TS14(r1) | -528.6235876 | 38.7                                         |
| TS15(r1) | -528.6472131 | 46.4                                         |
| TS1(r2)  | -528.5731479 | 49.0                                         |
| TS2(r2)  | -528.5907889 | 54.2                                         |
| TS3(r2)  | -528.6057504 | 44.8                                         |
| TS8(r2)  | -528.6258462 | 36.1                                         |

**Table 7(S).** Total energies and relative energies of the intermediates and product in the solvent phase at the MPWB95 level.

| Species     | E+ZPE(a.u)   | $\Delta E_{\text{rel}}(\text{kcal.mol}^{-1})$ |
|-------------|--------------|-----------------------------------------------|
| R1+ R2      | -528.6721157 | 0.0                                           |
| Inter1(r1)  | -528.7013928 | -18.4                                         |
| Inter2(r1)  | -528.7078207 | -22.4                                         |
| Inter3(r1)  | -528.6911158 | -11.9                                         |
| Inter4(r1)  | -528.6779319 | -3.6                                          |
| Inter5 (r1) | -528.7131069 | -25.7                                         |
| Inter6 (r1) | -528.699838  | -17.4                                         |
| Inter7 (r1) | -528.720666  | -30.5                                         |
| Inter8(r1)  | -528.6991209 | -29.8                                         |
| Inter9(r1)  | -528.746668  | -46.8                                         |
| Inter1(r2)  | -528.7013928 | -18.4                                         |
| Inter3(r2)  | -528.7032059 | -19.5                                         |
| P           | -528.7489884 | -48.2                                         |

**Table 8(S).** Total energies and relative energies of activation for two main pathways in the solvent phase at the MPWB95 level.

| Species  | E+ZPE(a.u)   | $\Delta E^\ddagger$ (kcal.mol <sup>-1</sup> ) |
|----------|--------------|-----------------------------------------------|
| TS1(r1)  | -528.6263138 | 28.7                                          |
| TS2(r1)  | -528.5963247 | 66.0                                          |
| TS3(r1)  | -528.6162498 | 53.5                                          |
| TS4(r1)  | -528.5963247 | 58.7                                          |
| TS5(r1)  | -528.5841472 | 67.1                                          |
| TS6(r1)  | -528.5820048 | 60.1                                          |
| TS7(r1)  | -528.6110032 | 60.7                                          |
| TS8(r1)  | -528.6106628 | 61.0                                          |
| TS9(r1)  | -528.6194729 | 55.4                                          |
| TS10(r1) | -528.5841472 | 77.6                                          |
| TS11(r1) | -528.6040534 | 60.1                                          |
| TS12(r1) | -528.5963247 | 33.4                                          |
| TS13(r1) | -528.649259  | 44.8                                          |
| TS14(r1) | -528.6377286 | 47.3                                          |
| TS15(r1) | -528.6472131 | 54.1                                          |
| TS1(r2)  | -528.6012682 | 44.5                                          |
| TS2(r2)  | -528.6249088 | 48.0                                          |
| TS3(r2)  | -528.6229073 | 49.3                                          |
| TS8(r2)  | -528.6460246 | 22.8                                          |

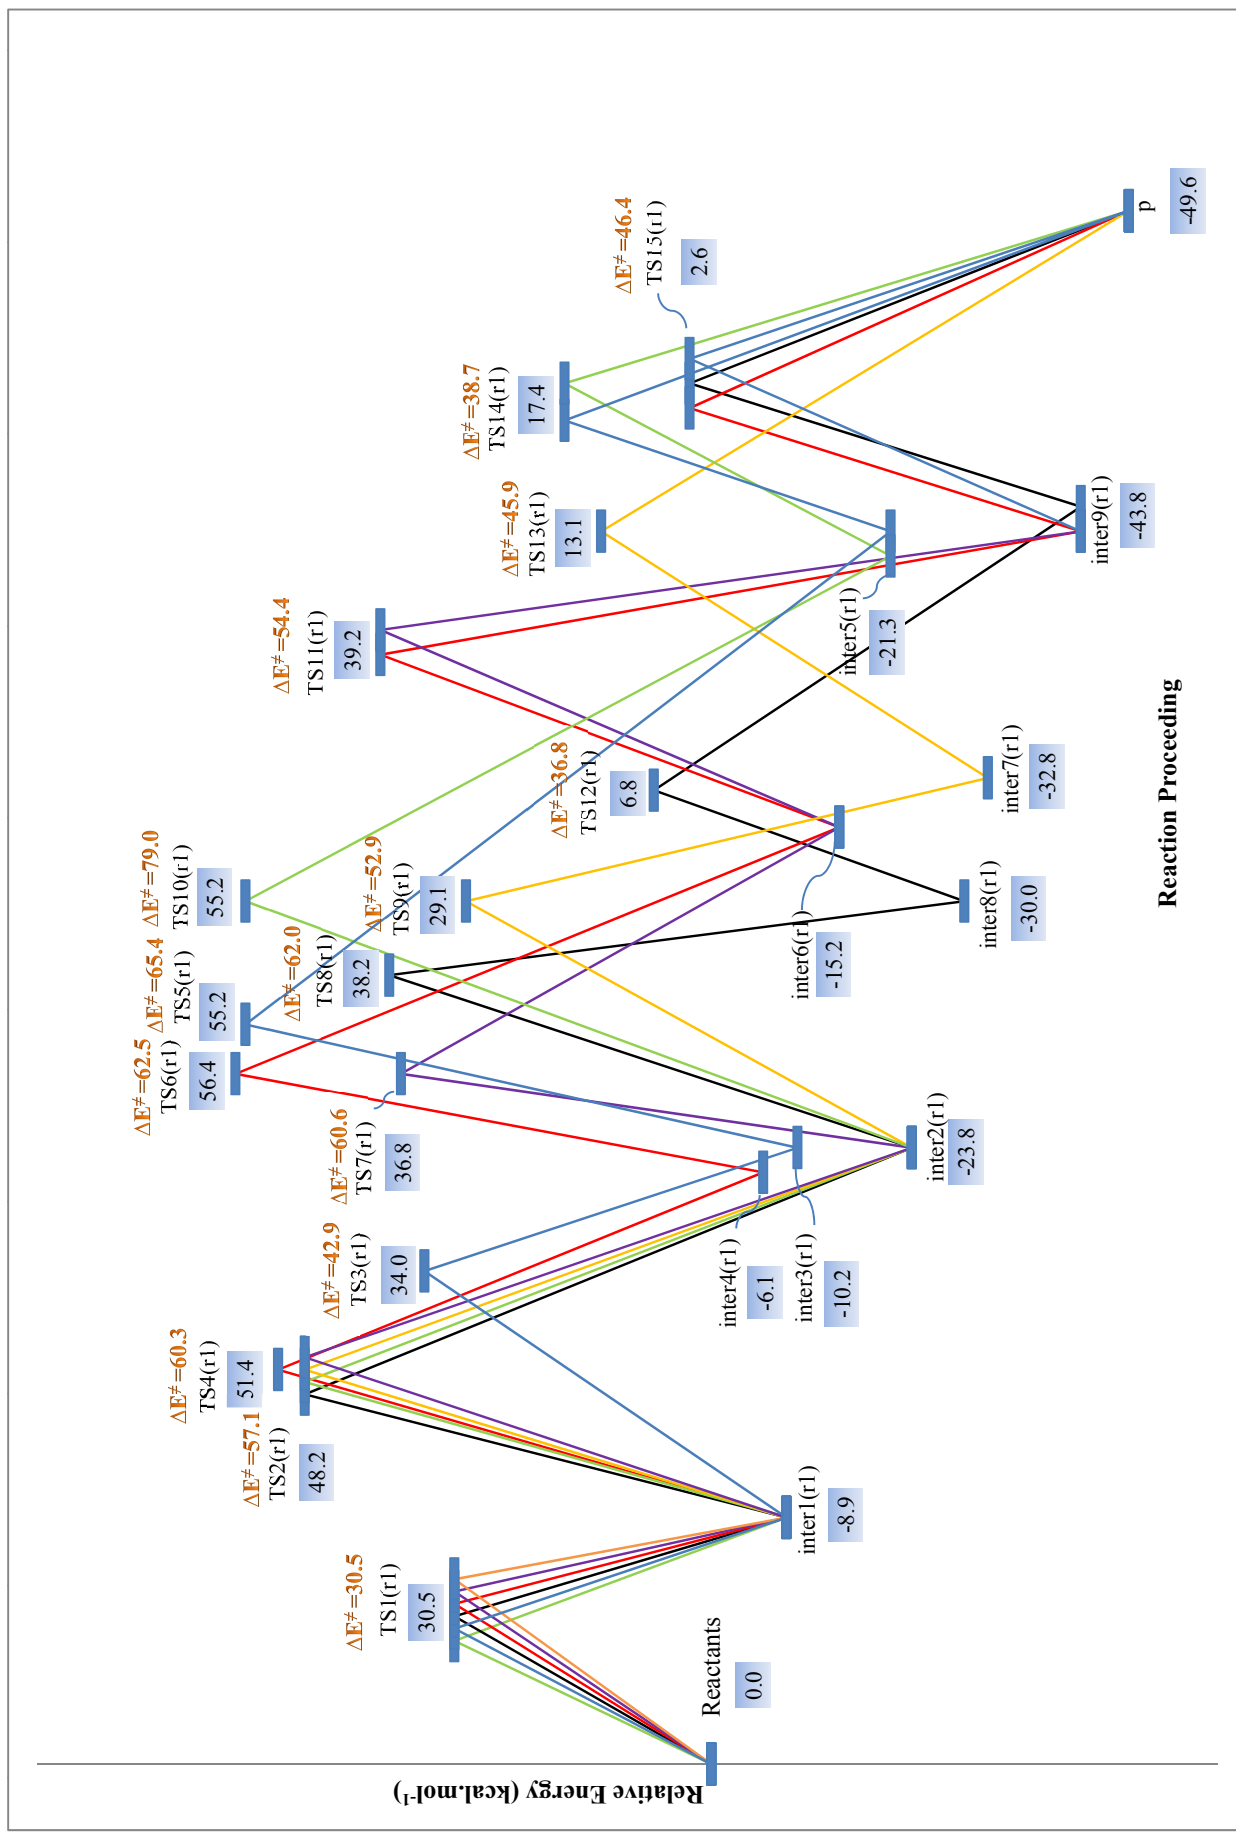

Figure 1(S). Potential energy diagram, according to the relative energy of the species involved in route1 in the gas phase

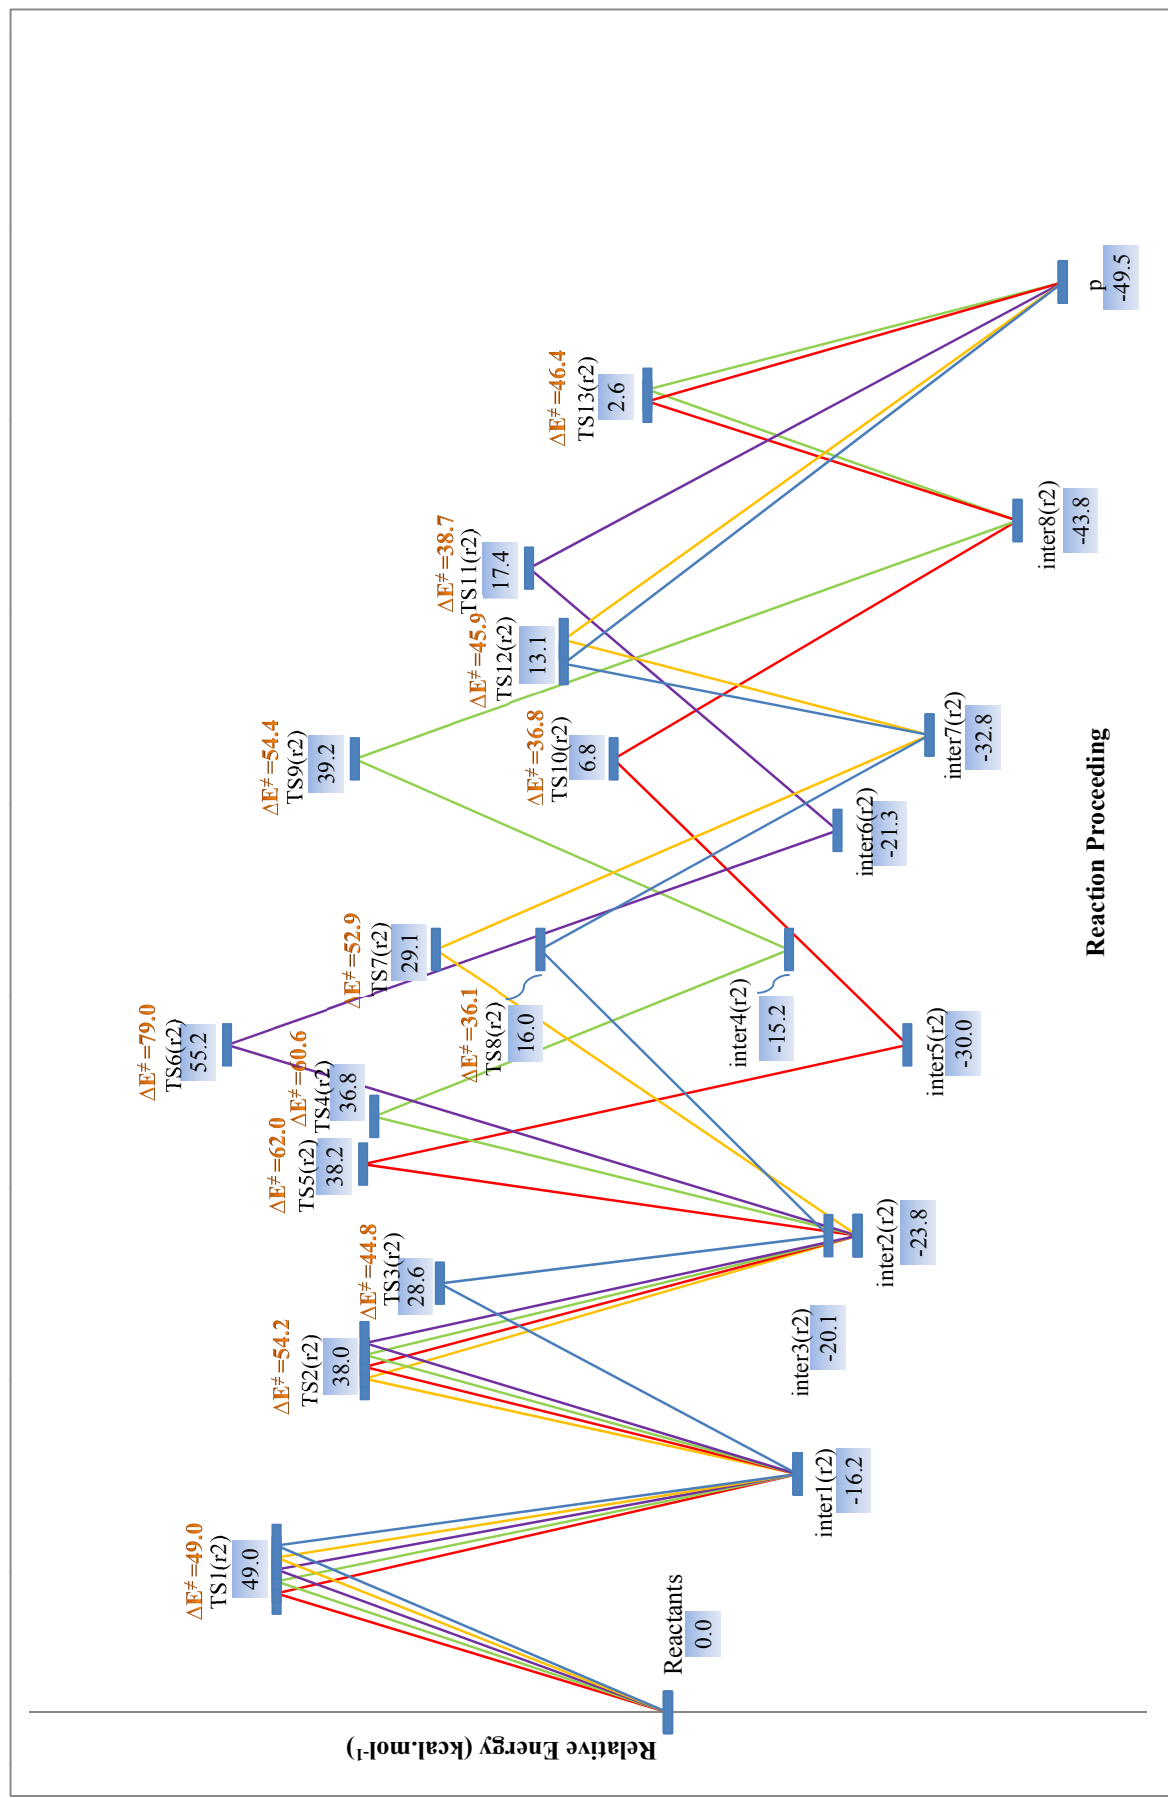

**Figure 2(S).** Potential energy diagram, according to the relative energy of the species involved in route 2 in the gas phase



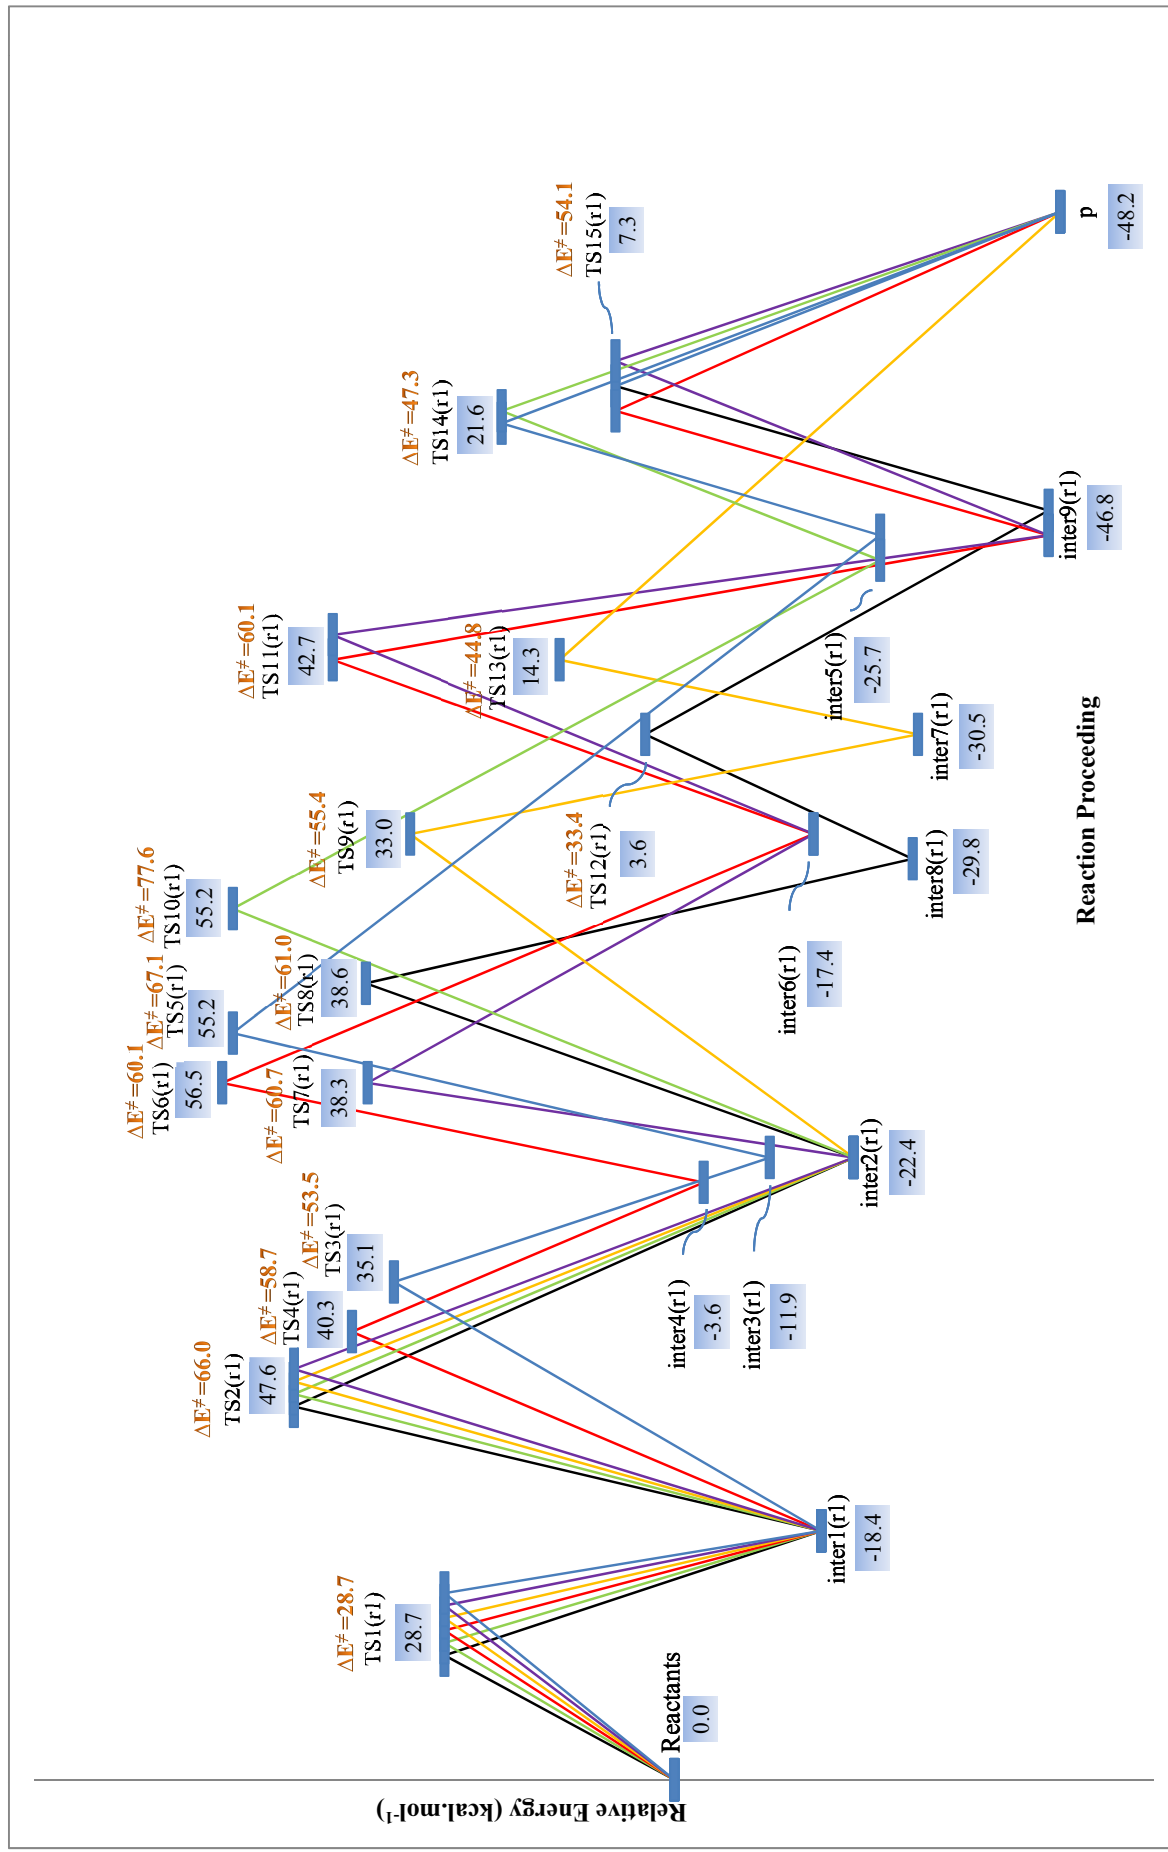

Figure 3(S). Potential energy diagram, according to the relative energy of the species involved in route 1 in the solvent phase

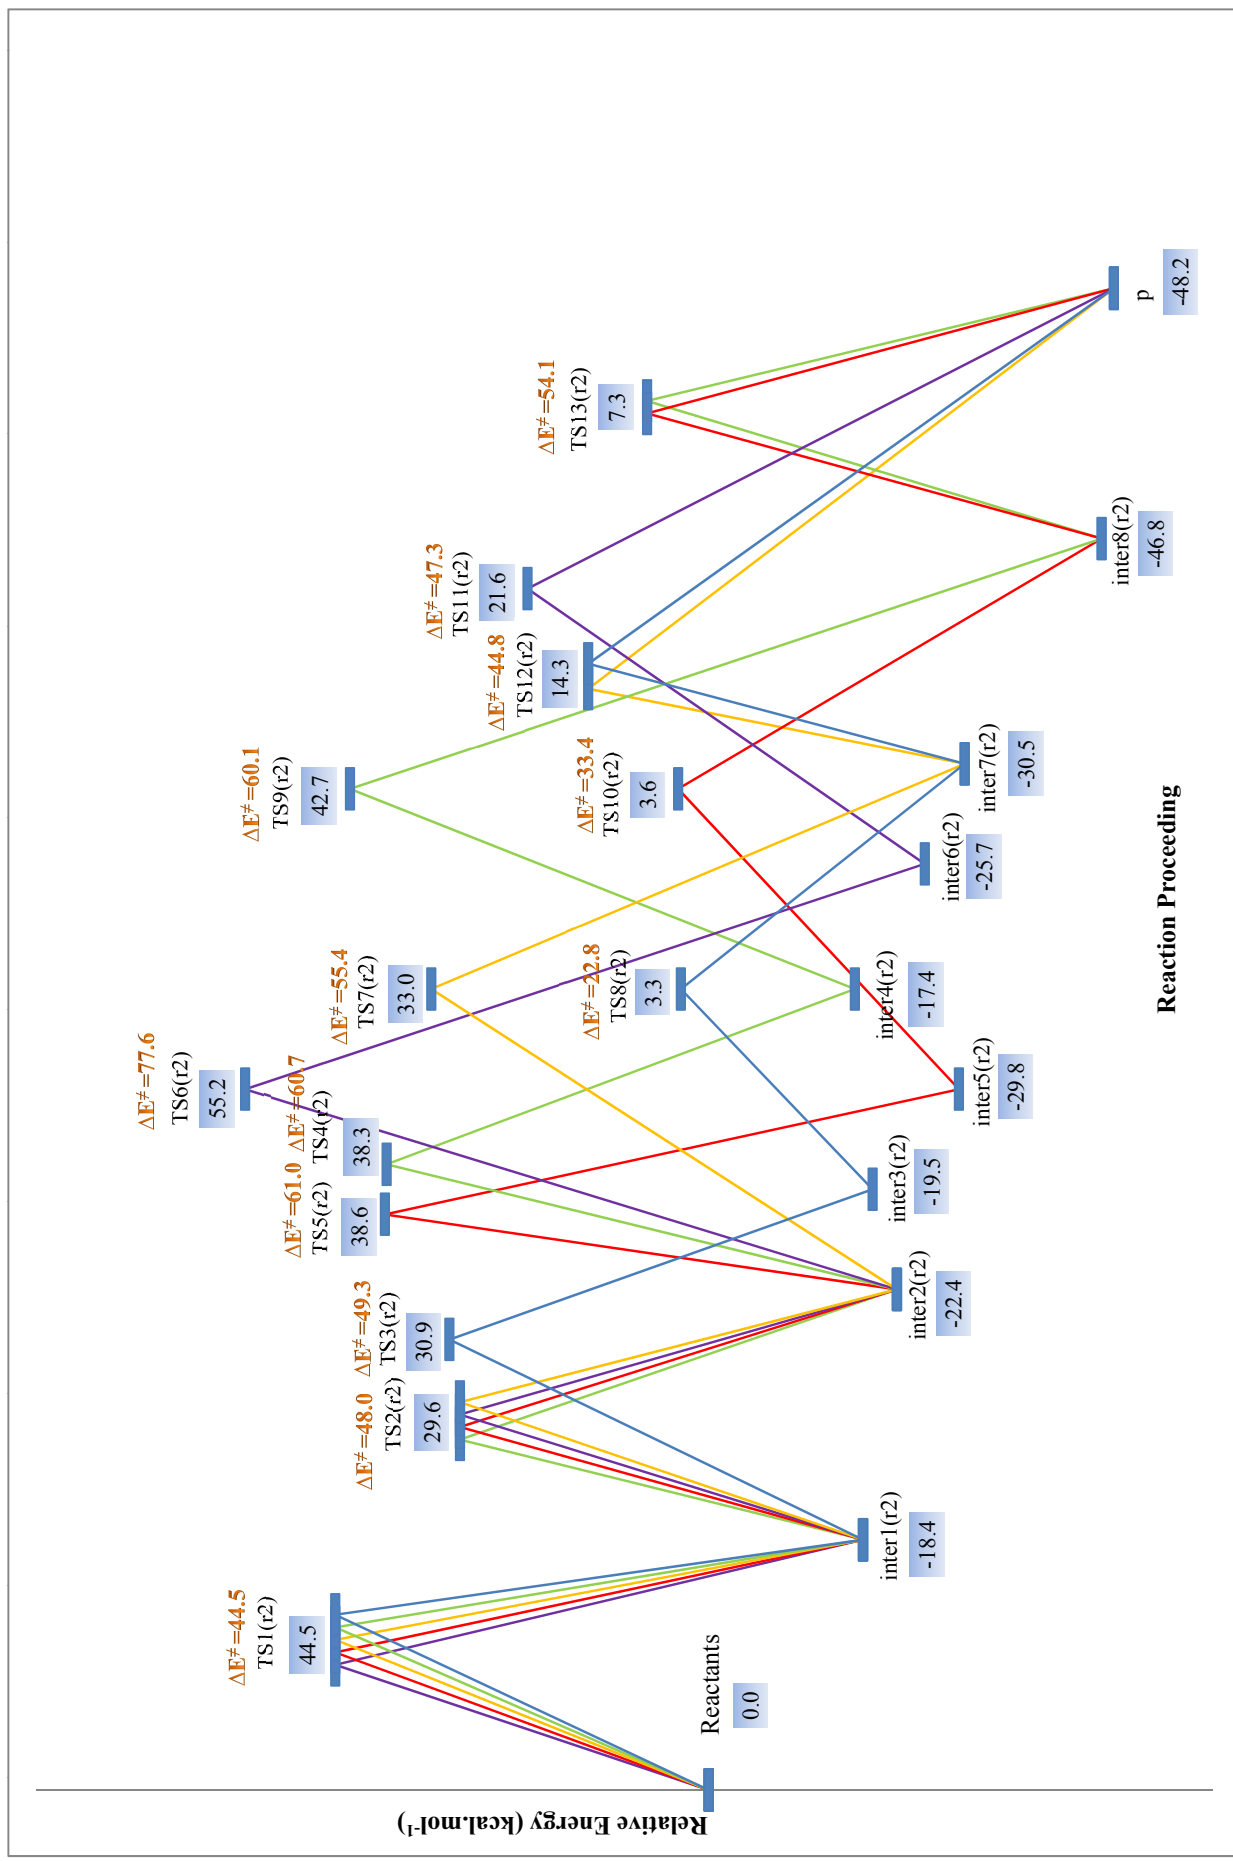

Figure 4(S). Potential energy diagram, according to the relative energy of the species involved in route 2 in the solvent phase.

## Cartesian coordinates of the structures

Reactants:

```
0 1
C      -0.20188300 -2.43203300 -1.75967900
N      -0.43794700 -1.83891100 -0.79603000
C       0.09975600 -3.15821900 -2.94791600
C      -0.96275400 -3.72228900 -3.71277200
N      -1.80866500 -4.19299600 -4.34384800
C       1.39809300 -3.31116600 -3.33299900
H       2.19621000 -2.87958700 -2.73279400
O       1.72975800 -3.98484300 -4.41286100
C       3.14417000 -4.04834600 -4.78215400
C       3.55058800 -2.82403600 -5.57924300
H       3.72953300 -4.16224300 -3.86504800
H       3.20818400 -4.96074000 -5.37453100
H       3.45870800 -1.90461900 -4.99457500
H       4.59520200 -2.92528800 -5.88610100
H       2.93835400 -2.72949700 -6.47822900
N       2.05607100 -6.75493100 -6.59243500
N       1.06677400 -6.99166800 -5.57878900
H       1.64376700 -6.59692500 -7.51024500
H       2.64104600 -7.58097700 -6.65365900
H       0.75841600 -6.09227700 -5.22702600
H       0.25312300 -7.48225500 -5.94166700
```

Interl(r1):

```
0 1
C       1.35916200 -4.75450200 -2.12482800
N       0.59003300 -5.36240000 -1.52092700
C       2.32964700 -3.97649100 -2.90096500
C       2.57557100 -2.67441500 -2.27059900
N       2.77757500 -1.63276100 -1.82086800
C       1.85496700 -3.84192100 -4.38991400
H       0.85883600 -3.37225400 -4.40766000
O       1.77948800 -5.14667400 -4.87864700
C       0.64105700 -5.45878400 -5.70623800
C       0.72751900 -6.92590400 -6.07514600
H      -0.27827500 -5.25348300 -5.14322100
H       0.66081000 -4.82023600 -6.59333700
H       0.71787000 -7.55301700 -5.18105400
H      -0.12627000 -7.20136900 -6.70013200
H       1.64369300 -7.13025100 -6.63354000
N       2.41087200 -2.76124600 -6.42686900
N       2.85374800 -3.06653300 -5.10550300
H       3.19995800 -2.84595300 -7.05661900
H       2.03495600 -1.81836400 -6.49349800
H       3.27416900 -4.53155000 -2.93432000
H       3.11139000 -2.23037700 -4.58764900
```

Inter2(r1):

0 1

|   |             |             |             |
|---|-------------|-------------|-------------|
| C | 1.12915200  | 1.66841600  | -0.19489700 |
| N | 1.24162500  | 2.60129500  | -0.86257900 |
| C | 0.99907100  | 0.47746200  | 0.64242600  |
| C | 1.93608200  | -0.64608500 | 0.17972800  |
| N | 3.12086400  | -0.78621400 | 0.60635400  |
| C | -0.37631300 | -0.22410400 | 0.47069500  |
| H | -0.52887600 | -0.89000000 | 1.33124400  |
| O | -1.41636600 | 0.67494800  | 0.33306600  |
| C | -2.73318300 | 0.20561000  | 0.68103200  |
| C | -3.42255900 | -0.55280600 | -0.44406400 |
| H | -2.66317300 | -0.40931800 | 1.58708700  |
| H | -3.28663300 | 1.11214300  | 0.93099600  |
| H | -2.88926700 | -1.47207600 | -0.69344900 |
| H | -4.43980400 | -0.81572900 | -0.13804200 |
| H | -3.48806500 | 0.06865000  | -1.34044500 |
| N | -0.19071000 | -1.08028400 | -0.73238700 |
| N | 1.19935100  | -1.42154500 | -0.71791700 |
| H | 1.21750100  | 0.73873600  | 1.67791100  |
| H | -0.34461500 | -0.48260800 | -1.54477400 |
| H | 3.58901000  | -1.59529000 | 0.19463800  |
| H | 1.37343400  | -2.41782800 | -0.73352000 |

Inter3(r1):

0 1

|   |             |             |             |
|---|-------------|-------------|-------------|
| C | 1.28346400  | -2.24413400 | -0.78467700 |
| N | 0.95921400  | -3.26442800 | -1.22462400 |
| C | 1.66310600  | -0.98434800 | -0.24930100 |
| C | 2.82873200  | -0.87530500 | 0.55555600  |
| N | 3.76081100  | -0.70746200 | 1.22193000  |
| C | 0.89580500  | 0.13143000  | -0.50671700 |
| H | -0.00071900 | 0.02795600  | -1.10632200 |
| O | -2.25407000 | 0.91786000  | 0.35642900  |
| C | -3.60845300 | 0.98692700  | -0.12790200 |
| C | -4.25693100 | -0.38376200 | -0.24312400 |
| H | -4.19826600 | 1.64610400  | 0.51980500  |
| H | -3.53530000 | 1.46474000  | -1.10678800 |
| H | -4.33882200 | -0.86683800 | 0.73583900  |
| H | -5.26789600 | -0.29066700 | -0.65033100 |
| H | -3.67847600 | -1.03659600 | -0.90069800 |
| N | 0.27714400  | 2.46189400  | -0.23671300 |
| N | 1.14522100  | 1.36842900  | -0.06282400 |
| H | -0.67818100 | 2.16651500  | -0.03428300 |
| H | 0.34422500  | 2.80329900  | -1.19104900 |
| H | -2.25629100 | 0.48815500  | 1.21899800  |
| H | 1.92707000  | 1.53974800  | 0.55594300  |

Inter4(r1):

0 1

|   |             |             |             |
|---|-------------|-------------|-------------|
| C | 2.96816400  | -0.33415300 | 0.79183500  |
| N | 3.61393600  | -0.64226800 | 1.69473200  |
| C | 2.11397800  | 0.01868200  | -0.35584400 |
| C | 2.03817000  | 1.48212400  | -0.51337800 |
| N | 1.93526500  | 2.62110200  | -0.65295100 |
| C | 0.72718600  | -0.59448700 | -0.23100000 |
| H | 0.11465600  | -0.31160300 | 0.62594000  |
| O | -2.65053500 | -0.59270800 | 0.92905500  |
| C | -3.53473600 | 0.54617900  | 0.89986300  |
| C | -3.28124100 | 1.31817900  | -0.37992900 |
| H | -4.57562300 | 0.20499700  | 0.94386900  |
| H | -3.34427600 | 1.17932300  | 1.77401400  |
| H | -3.47913800 | 0.69578000  | -1.25609000 |
| H | -3.93796000 | 2.19066000  | -0.42648600 |
| H | -2.24756000 | 1.66818000  | -0.42699400 |
| N | -0.84452900 | -2.00926200 | -1.04383400 |
| N | 0.35852000  | -1.40651800 | -1.14228600 |
| H | -1.15221300 | -2.38809400 | -1.92548000 |
| H | -1.56047100 | -1.56049900 | -0.47062300 |
| H | 2.56917000  | -0.39834300 | -1.26088400 |
| H | -2.81378100 | -1.09926100 | 1.73139200  |

Inter5(r1):

0 1

|   |             |             |             |
|---|-------------|-------------|-------------|
| C | 0.53597400  | 1.57526900  | 0.00800600  |
| N | -0.05598300 | 2.56925200  | 0.00748500  |
| C | 1.18363800  | 0.32118400  | -0.00332100 |
| C | 2.63171500  | 0.08019000  | -0.01579600 |
| N | 3.56070100  | 0.94805900  | 0.04574300  |
| C | 0.55184000  | -0.88354200 | 0.01437500  |
| H | -0.51306500 | -1.07207900 | -0.02394300 |
| O | -2.39295000 | 0.27883400  | -0.11291500 |
| C | -3.81641100 | 0.34749100  | 0.02846300  |
| C | -4.36449200 | -1.06723100 | 0.05101900  |
| H | -4.07752100 | 0.87109100  | 0.95684500  |
| H | -4.25043900 | 0.90946000  | -0.80827500 |
| H | -3.94642100 | -1.62958700 | 0.88999800  |
| H | -5.45266700 | -1.05253800 | 0.15647400  |
| H | -4.11695500 | -1.59157300 | -0.87563300 |
| N | 1.45793200  | -1.90920400 | 0.08605700  |
| N | 2.75039800  | -1.34206400 | -0.11079200 |
| H | -2.02832600 | 1.17323400  | -0.11052800 |
| H | 1.28684000  | -2.72266700 | -0.49596900 |
| H | 4.48942400  | 0.53133100  | -0.00498800 |
| H | 3.42780900  | -1.74980400 | 0.52341500  |

Inter6(r1):

0 1

|   |             |             |             |
|---|-------------|-------------|-------------|
| C | -0.58271700 | 1.45480000  | -0.05240700 |
| N | -0.06790500 | 2.38147200  | -0.50516500 |
| C | -1.15099000 | 0.24052000  | 0.51533000  |
| C | -2.64245200 | 0.01184200  | 0.20707900  |
| N | -3.56058600 | 0.86526000  | 0.38800700  |
| C | -0.53910800 | -1.03673400 | -0.04172000 |
| H | 0.52241400  | -1.23310800 | -0.09681100 |
| O | 2.39497100  | 0.32376700  | -0.09536400 |
| C | 3.82670000  | 0.35391500  | -0.12152600 |
| C | 4.34104900  | -0.99724500 | 0.33908800  |
| H | 4.18079900  | 0.56871500  | -1.13795600 |
| H | 4.19907700  | 1.14730500  | 0.53925800  |
| H | 3.98332900  | -1.79152800 | -0.32095400 |
| H | 5.43433800  | -1.01100200 | 0.33200000  |
| H | 4.00095200  | -1.21304400 | 1.35504400  |
| N | -1.42372500 | -1.86326500 | -0.45129800 |
| N | -2.67425700 | -1.30462000 | -0.23833800 |
| H | 2.05113900  | 1.17962900  | -0.37872100 |
| H | -1.02113300 | 0.27893000  | 1.60435900  |
| H | -4.48398600 | 0.50806400  | 0.14224700  |
| H | -3.45628400 | -1.73861300 | -0.70306600 |

Inter7(r1):

0 1

|   |             |             |             |
|---|-------------|-------------|-------------|
| C | 1.26459500  | 1.65141400  | 0.23696700  |
| N | 1.53850100  | 2.71113700  | -0.12562800 |
| C | 0.99619300  | 0.30066400  | 0.70601200  |
| C | 1.62726500  | -0.82204000 | -0.11381100 |
| N | 2.92682400  | -0.74748400 | -0.56391200 |
| C | -0.48905700 | -0.14328100 | 0.66870800  |
| H | -1.02123400 | 0.10397500  | 1.59187000  |
| O | -1.12902400 | 0.45386600  | -0.43716100 |
| C | -2.49809800 | 0.83077200  | -0.25190400 |
| C | -3.46866500 | -0.34422400 | -0.29608300 |
| H | -2.59952100 | 1.38316900  | 0.69172200  |
| H | -2.70507500 | 1.52747500  | -1.06568100 |
| H | -3.31851800 | -1.03144900 | 0.54207900  |
| H | -4.49764500 | 0.02264700  | -0.23652400 |
| H | -3.35869100 | -0.90083400 | -1.22999300 |
| N | -0.30627000 | -1.59602700 | 0.56064200  |
| N | 0.87514100  | -1.85049800 | -0.19260600 |
| H | 1.36776800  | 0.21144000  | 1.73434400  |
| H | -1.08430400 | -2.05214100 | 0.09832800  |
| H | 3.21830300  | 0.15706300  | -0.90995600 |
| H | 3.19834500  | -1.51200000 | -1.16771300 |

## Inter8(r1)

0 1

|   |             |             |             |
|---|-------------|-------------|-------------|
| C | 1.34879200  | 1.73215000  | 0.13485900  |
| N | 1.71952300  | 2.83172000  | 0.12869300  |
| C | 0.92766800  | 0.39318300  | 0.15473900  |
| C | 1.72718600  | -0.68760300 | -0.05612900 |
| N | 3.08298600  | -0.75380300 | -0.20129900 |
| C | -0.48757900 | -0.07537000 | 0.38225000  |
| H | -0.88930300 | 0.21669700  | 1.36051700  |
| O | -1.36693100 | 0.40406600  | -0.62092100 |
| C | -2.66916000 | 0.81312400  | -0.18033400 |
| C | -3.61040100 | -0.35508000 | 0.08897100  |
| H | -2.57107300 | 1.44742100  | 0.70943700  |
| H | -3.05138000 | 1.43780700  | -0.98949200 |
| H | -3.24162500 | -0.99193600 | 0.89813600  |
| H | -4.59683000 | 0.01858400  | 0.38018600  |
| H | -3.73052200 | -0.96913600 | -0.80747300 |
| N | -0.36148500 | -1.56250100 | 0.29640200  |
| N | 1.00763100  | -1.88092600 | -0.04613000 |
| H | 3.56399200  | 0.12818800  | -0.30627500 |
| H | -0.92132700 | -1.83900400 | -0.50526800 |
| H | 3.43776000  | -1.49610100 | -0.78691500 |
| H | 1.37614000  | -2.54890100 | 0.62472900  |

## Inter9(r1):

0 1

|   |             |             |             |
|---|-------------|-------------|-------------|
| C | 0.50502600  | 1.45057000  | -0.03518200 |
| N | -0.04946900 | 2.46824900  | -0.05608000 |
| C | 1.16596700  | 0.20905600  | -0.01534500 |
| C | 2.54559000  | -0.00031500 | 0.04567400  |
| N | 3.58571200  | 0.89041700  | 0.18888800  |
| C | 0.59917400  | -1.10028300 | -0.08020800 |
| H | -0.45157700 | -1.34089100 | -0.14213300 |
| O | -2.48039500 | 0.28257200  | -0.20479000 |
| C | -3.87132600 | 0.38418700  | 0.11004800  |
| C | -4.46578600 | -1.01219300 | 0.10211900  |
| H | -4.00498100 | 0.84704800  | 1.09697700  |
| H | -4.38222100 | 1.01678500  | -0.62810800 |
| H | -3.97176800 | -1.64488800 | 0.84381800  |
| H | -5.53311400 | -0.97407200 | 0.33738600  |
| H | -4.34530100 | -1.47579900 | -0.88020600 |
| N | 1.52631600  | -2.03152100 | -0.06545200 |
| N | 2.70912600  | -1.34148100 | 0.01187900  |
| H | -2.08587900 | 1.16285300  | -0.19104900 |
| H | 3.32790900  | 1.86024400  | 0.07079400  |
| H | 4.44686100  | 0.66015200  | -0.28656700 |
| H | 3.56957500  | -1.85779200 | 0.10011400  |

Inter1(r2):

0 1

|   |             |             |             |
|---|-------------|-------------|-------------|
| C | 1.04196900  | 2.16323100  | 0.02952700  |
| N | 1.38661700  | 3.26303200  | 0.11160900  |
| C | 0.52282000  | 0.83406300  | -0.07870100 |
| C | 1.50513700  | -0.28122800 | 0.05266600  |
| N | 2.74230800  | 0.03495900  | 0.16893400  |
| C | -0.81050200 | 0.75493200  | -0.30113300 |
| H | -1.39654400 | 1.66721900  | -0.37328300 |
| O | -1.48447000 | -0.39335200 | -0.47169200 |
| C | -2.92983400 | -0.30091900 | -0.53855600 |
| C | -3.55451100 | -0.24607400 | 0.84403300  |
| H | -3.19361800 | 0.57366800  | -1.14163000 |
| H | -3.23479200 | -1.19548600 | -1.08121800 |
| H | -3.24492700 | 0.64962400  | 1.38815200  |
| H | -4.64401100 | -0.22653800 | 0.75270600  |
| H | -3.27427200 | -1.12294400 | 1.43135800  |
| N | 1.77340400  | -2.70664700 | 0.01701600  |
| N | 0.97482200  | -1.55864300 | 0.06561900  |
| H | 2.26096600  | -2.83546800 | 0.89868300  |
| H | 2.45667400  | -2.64777600 | -0.73584500 |
| H | 3.33762600  | -0.78721900 | 0.26081400  |
| H | 0.01812000  | -1.70121400 | -0.21546800 |

Inter3(r2):

0 1

|   |             |             |             |
|---|-------------|-------------|-------------|
| C | 0.96980400  | 2.09770300  | -0.11284400 |
| N | 1.43377000  | 3.15740700  | -0.05556900 |
| C | 0.44239100  | 0.77255700  | -0.15816800 |
| C | 1.39393600  | -0.34580000 | 0.02985800  |
| N | 2.59753100  | -0.06311700 | 0.67460400  |
| C | -0.90009600 | 0.68101200  | -0.35607500 |
| H | -1.47350700 | 1.59867900  | -0.47615000 |
| O | -1.58003200 | -0.45376700 | -0.42915500 |
| C | -3.02136700 | -0.34613000 | -0.45549700 |
| C | -3.59946400 | -0.25375500 | 0.94631100  |
| H | -3.30292200 | 0.51717500  | -1.06831500 |
| H | -3.35315100 | -1.25094200 | -0.96449100 |
| H | -3.26596800 | 0.65377000  | 1.45620900  |
| H | -4.69167300 | -0.23221000 | 0.89520400  |
| H | -3.29848300 | -1.11679600 | 1.54364400  |
| N | 2.05586100  | -2.50056000 | -0.11188900 |
| N | 1.07030300  | -1.52870100 | -0.35850300 |
| H | 1.64966600  | -3.40139100 | -0.33074400 |
| H | 2.35233400  | -2.50494800 | 0.86625900  |
| H | 2.84158600  | 0.91394700  | 0.75892600  |
| H | 3.36890600  | -0.63587100 | 0.35069200  |



17

product:

0 1

|   |             |             |             |
|---|-------------|-------------|-------------|
| C | -0.55581700 | 1.49990800  | -0.00446000 |
| N | -0.03580500 | 2.53532300  | -0.01369400 |
| C | -1.17173600 | 0.23355400  | -0.00268700 |
| C | -2.56971400 | -0.07835400 | 0.02124300  |
| N | -3.61655700 | 0.81272500  | 0.11866600  |
| C | -0.53096300 | -1.00082100 | -0.03246000 |
| H | 0.52497200  | -1.22288600 | -0.05843800 |
| O | 2.42238400  | 0.27817300  | -0.10437600 |
| C | 3.83995300  | 0.40397700  | 0.05003700  |
| C | 4.44687100  | -0.98675900 | 0.04577000  |
| H | 4.25714900  | 1.00198500  | -0.77044500 |
| H | 4.07317500  | 0.91703100  | 0.99198000  |
| H | 4.22810300  | -1.49984000 | -0.89424500 |
| H | 5.53266400  | -0.92910500 | 0.16118100  |
| H | 4.04573200  | -1.58484900 | 0.86808000  |
| N | -1.50490300 | -1.92022900 | -0.02365200 |
| N | -2.76207800 | -1.38942300 | 0.00293700  |
| H | 2.02331500  | 1.15699300  | -0.09762000 |
| H | -1.40510900 | -2.92193300 | -0.03970700 |
| H | -4.52014900 | 0.42750400  | -0.11509300 |
| H | -3.45509100 | 1.73191100  | -0.26514500 |

Gas phase:

TS1(r1):

0 1

|   |             |             |             |
|---|-------------|-------------|-------------|
| C | -0.96795000 | -0.03192200 | 1.48703500  |
| N | -0.72081400 | 0.05609000  | 2.61594000  |
| C | -1.23504200 | -0.04962300 | 0.08406400  |
| C | -2.15572400 | -1.02184400 | -0.40635800 |
| N | -2.90670700 | -1.77368500 | -0.86782600 |
| C | -0.04518900 | 0.30674700  | -0.83996600 |
| H | -0.24263700 | -0.08392000 | -1.84611500 |
| O | 1.25365400  | 0.09237300  | -0.42775800 |
| C | 1.63449800  | -1.29893600 | -0.33145200 |
| C | 3.06644100  | -1.36124800 | 0.15612500  |
| H | 0.95624900  | -1.80377500 | 0.36297300  |
| H | 1.52690300  | -1.76177300 | -1.32030000 |
| H | 3.15816500  | -0.90321000 | 1.14290700  |
| H | 3.38186200  | -2.40476200 | 0.23227000  |
| H | 3.73888900  | -0.84895400 | -0.53563300 |
| N | 0.46303200  | 2.66258500  | -0.02343700 |
| N | -0.29356200 | 1.82108600  | -0.89737900 |
| H | 1.41780300  | 2.30638900  | 0.00207500  |
| H | 0.07970200  | 2.55270100  | 0.91266500  |
| H | -1.37647100 | 1.38150600  | -0.37653600 |
| H | -0.24554300 | 2.20524100  | -1.84001700 |

TS2(r1):

0 1

|   |             |             |             |
|---|-------------|-------------|-------------|
| C | 1.28066900  | 1.88313800  | -0.02582000 |
| N | 1.57363400  | 2.91092500  | -0.46019400 |
| C | 0.88617000  | 0.57779500  | 0.48510100  |
| C | 1.98071700  | -0.49130200 | 0.38496000  |
| N | 2.83237400  | -1.07080300 | 1.06364100  |
| C | -0.29986900 | -0.04352800 | -0.34682900 |
| H | -0.39208200 | 0.48610500  | -1.30308100 |
| O | -1.47821900 | 0.00672200  | 0.37724700  |
| C | -2.68946000 | -0.04613000 | -0.40837000 |
| C | -3.86667600 | 0.03935200  | 0.54063800  |
| H | -2.68563700 | 0.79560300  | -1.11149600 |
| H | -2.71015900 | -0.97708100 | -0.98445100 |
| H | -3.83504700 | 0.96762700  | 1.11484100  |
| H | -4.80122200 | 0.01462000  | -0.02565500 |
| H | -3.86532900 | -0.80082000 | 1.23832900  |
| N | 1.50507600  | -1.43912500 | -0.74675500 |
| N | 0.06314400  | -1.46755100 | -0.66871800 |
| H | 1.79208900  | -1.21010100 | -1.70238700 |
| H | 2.33344800  | -2.02891300 | -0.02390200 |
| H | 0.57880200  | 0.67407300  | 1.52840600  |
| H | -0.15800900 | -2.02496600 | 0.15752900  |

TS3(r1):

0 1

|   |             |             |             |
|---|-------------|-------------|-------------|
| C | -1.40829900 | -1.65572200 | -0.75200500 |
| N | -1.64751400 | -2.56730200 | -1.42198600 |
| C | -1.03982600 | -0.54793200 | 0.08181100  |
| C | -2.01819300 | -0.08638700 | 1.02289000  |
| N | -2.74676200 | 0.34066000  | 1.81391900  |
| C | -0.20193700 | 0.51610500  | -0.57833800 |
| H | 0.21519900  | 0.29630500  | -1.55423200 |
| O | 1.19101300  | 0.01753500  | 0.44354800  |
| C | 2.36205700  | -0.52385500 | -0.18703600 |
| C | 3.31493100  | -1.06412400 | 0.86794300  |
| H | 2.07482000  | -1.31886200 | -0.88846900 |
| H | 2.83330000  | 0.27986600  | -0.76194200 |
| H | 2.84851200  | -1.87141900 | 1.43748200  |
| H | 4.21601100  | -1.45998900 | 0.39072500  |
| H | 3.60840300  | -0.27525200 | 1.56379500  |
| N | 0.39797800  | 2.76178500  | -0.90044800 |
| N | -0.50427700 | 1.81378200  | -0.37683100 |
| H | 1.05475000  | 3.05959500  | -0.18278100 |
| H | -0.12289300 | 3.56298200  | -1.23925400 |
| H | 0.19535900  | -0.72909400 | 0.67236800  |
| H | -0.99993900 | 2.04460200  | 0.47976000  |

TS4(r1):

0 1

|   |             |             |             |
|---|-------------|-------------|-------------|
| C | 0.75456200  | -1.64360300 | 0.73272400  |
| N | 0.55934800  | -2.52648500 | 1.44475000  |
| C | 1.02012800  | -0.51982400 | -0.17390500 |
| C | 2.41560900  | -0.55139500 | -0.65606600 |
| N | 3.49939400  | -0.53468100 | -1.04589900 |
| C | 0.74352400  | 0.80713800  | 0.50715000  |
| H | 1.07093200  | 0.96766600  | 1.52870100  |
| O | -1.50452100 | 0.45643400  | 0.02376800  |
| C | -2.74898500 | -0.17427400 | 0.07166600  |
| C | -2.93105400 | -1.26179800 | -0.99098700 |
| H | -2.89089900 | -0.62074500 | 1.07023800  |
| H | -3.55472000 | 0.57458900  | -0.03274900 |
| H | -2.19169500 | -2.05839800 | -0.86285600 |
| H | -3.92623000 | -1.71510800 | -0.92655300 |
| H | -2.81502900 | -0.84080600 | -1.99504200 |
| N | 0.11321200  | 3.01701700  | 0.53364200  |
| N | 0.34900700  | 1.82646900  | -0.19996200 |
| H | -0.83393600 | 2.94604800  | 0.90800100  |
| H | 0.14435300  | 3.78977200  | -0.12392700 |
| H | 0.33741100  | -0.60328700 | -1.02605500 |
| H | -0.47343900 | 1.49508700  | -0.80110900 |

TS5(r1):

0 1

|   |             |             |             |
|---|-------------|-------------|-------------|
| C | -2.82753100 | -1.09733600 | -0.04382700 |
| N | -3.64555200 | -1.89524400 | 0.13486700  |
| C | -1.84461800 | -0.10850600 | -0.26484900 |
| C | -1.24424700 | 0.77743500  | 0.77009100  |
| N | -0.78644700 | 0.80453800  | 1.91723400  |
| C | -1.07242800 | 0.01729000  | -1.37391300 |
| H | -1.04109900 | -0.64528100 | -2.22834000 |
| O | 1.86379900  | -0.21639400 | 0.37091300  |
| C | 3.15305800  | -0.77505400 | 0.66721800  |
| C | 4.01144000  | -0.68903400 | -0.58033400 |
| H | 3.61930400  | -0.22028100 | 1.49041300  |
| H | 3.04211800  | -1.81945700 | 0.98251800  |
| H | 4.13460600  | 0.35047400  | -0.89561000 |
| H | 5.00338100  | -1.10587500 | -0.38740600 |
| H | 3.55949400  | -1.25165900 | -1.40141400 |
| N | -0.19616400 | 1.11797000  | -1.36721700 |
| N | -0.44442300 | 1.79006700  | -0.11496000 |
| H | 1.30482300  | -0.27519400 | 1.15758600  |
| H | 0.78837800  | 0.85782500  | -1.43880900 |
| H | 0.06944100  | 1.70591200  | 1.02636700  |
| H | -0.93678500 | 2.66459900  | -0.30838700 |

TS6(r1):

0 1

|   |             |             |             |
|---|-------------|-------------|-------------|
| C | -0.56621900 | 1.62301900  | 0.26118100  |
| N | 0.03977800  | 2.55254400  | -0.04983700 |
| C | -1.25855100 | 0.41378600  | 0.67398800  |
| C | -2.63691800 | 0.18086900  | 0.05203300  |
| N | -3.45508800 | 0.64005100  | -0.74440100 |
| C | -0.57808600 | -0.87958200 | 0.19605500  |
| H | 0.50015600  | -0.96302400 | 0.09721900  |
| O | 2.36312400  | 0.35345700  | 0.01624300  |
| C | 3.76833800  | 0.25664200  | -0.25099300 |
| C | 4.19858900  | -1.18235000 | -0.03706900 |
| H | 3.97633200  | 0.56704100  | -1.28261000 |
| H | 4.32360000  | 0.92355800  | 0.42058800  |
| H | 3.66155200  | -1.85148200 | -0.71409800 |
| H | 5.26985100  | -1.29060600 | -0.22675700 |
| H | 3.99866400  | -1.49608000 | 0.99063200  |
| N | -1.35706200 | -1.84714100 | -0.12428900 |
| N | -2.69928800 | -1.36257100 | 0.01234200  |
| H | -1.31895500 | 0.40081800  | 1.77011500  |
| H | 2.07003100  | 1.26144500  | -0.12954200 |
| H | -3.47673800 | -0.88976300 | -0.86416800 |
| H | -3.17079300 | -1.84405600 | 0.78080100  |

TS7(r1):

0 1

|   |             |             |             |
|---|-------------|-------------|-------------|
| C | 0.72197600  | 1.79160500  | 0.28565500  |
| N | 0.32984000  | 2.81889300  | -0.05711600 |
| C | 1.21651900  | 0.50584200  | 0.76268200  |
| C | 2.04452700  | -0.29971600 | -0.25746000 |
| N | 3.09960400  | 0.14146800  | -0.79970400 |
| C | 0.13187100  | -0.47563200 | 1.12277400  |
| H | -0.55481400 | -0.35772700 | 1.94455600  |
| O | -1.41033500 | -0.48758500 | -0.20794500 |
| C | -2.53570000 | 0.14539100  | -0.77631500 |
| C | -3.82901700 | -0.11753800 | -0.00874000 |
| H | -2.33312900 | 1.22385300  | -0.82595300 |
| H | -2.63479500 | -0.19527000 | -1.81769200 |
| H | -3.75510100 | 0.25512900  | 1.01710000  |
| H | -4.67552100 | 0.38285900  | -0.49072800 |
| H | -4.04393400 | -1.18928100 | 0.03172000  |
| N | 0.34200800  | -1.67515700 | 0.57263100  |
| N | 1.39461800  | -1.52298200 | -0.38001400 |
| H | 1.85028200  | 0.69353500  | 1.64009400  |
| H | -0.69166100 | -1.65572100 | 0.00357900  |
| H | 3.52099400  | -0.52740500 | -1.44429800 |
| H | 1.93681700  | -2.36455900 | -0.51697100 |

21

TS8(r1):

0 1

|   |             |             |             |
|---|-------------|-------------|-------------|
| C | 1.23140000  | 1.63538400  | -0.23038600 |
| N | 1.42669000  | 2.63897200  | -0.77570100 |
| C | 1.02289400  | 0.42519700  | 0.50388400  |
| C | 1.82698300  | -0.73148000 | 0.07225500  |
| N | 2.95382800  | -0.72791900 | 0.72999100  |
| C | -0.39437300 | -0.18247000 | 0.43041400  |
| H | -0.62921600 | -0.74426800 | 1.34297000  |
| O | -1.38447400 | 0.73302700  | 0.13438000  |
| C | -2.70499500 | 0.44997900  | 0.62786700  |
| C | -3.47801400 | -0.53230800 | -0.24130100 |
| H | -2.63027300 | 0.08847400  | 1.66093900  |
| H | -3.20135200 | 1.42144000  | 0.64804700  |
| H | -2.99350300 | -1.51067400 | -0.26995100 |
| H | -4.48904700 | -0.66019900 | 0.15757900  |
| H | -3.56145500 | -0.15623300 | -1.26399500 |
| N | -0.26898000 | -1.21733800 | -0.69283100 |
| N | 1.12594100  | -1.59057200 | -0.68837200 |
| H | 2.30363000  | 0.24919800  | 1.34522300  |
| H | -0.43005800 | -0.70359200 | -1.56018600 |
| H | 3.72340200  | -1.36919500 | 0.54823800  |
| H | 1.29793900  | -2.58698800 | -0.67191400 |

TS9(r1):

0 1

|   |             |             |             |
|---|-------------|-------------|-------------|
| C | 1.14150500  | 1.75787100  | -0.14468700 |
| N | 1.29057500  | 2.72132200  | -0.75984500 |
| C | 0.97574000  | 0.54057800  | 0.64326400  |
| C | 1.86813700  | -0.58877600 | 0.16540700  |
| N | 2.99764300  | -1.19109100 | 0.49923300  |
| C | -0.40428900 | -0.19773400 | 0.41807100  |
| H | -0.59979400 | -0.78124400 | 1.32741600  |
| O | -1.43345800 | 0.68702500  | 0.15717200  |
| C | -2.75062300 | 0.29740700  | 0.59385800  |
| C | -3.42659900 | -0.69853200 | -0.33684200 |
| H | -2.68227900 | -0.09987200 | 1.61439500  |
| H | -3.30883900 | 1.23384100  | 0.63315400  |
| H | -2.87828200 | -1.64179100 | -0.38232300 |
| H | -4.43912000 | -0.90579500 | 0.02251400  |
| H | -3.50201500 | -0.28974700 | -1.34742700 |
| N | -0.16881400 | -1.17145900 | -0.68781000 |
| N | 1.24981800  | -1.36099400 | -0.70671000 |
| H | 1.11822500  | 0.77414300  | 1.69908600  |
| H | -0.42983200 | -0.72889800 | -1.56833200 |
| H | 3.82477600  | -0.64273100 | 0.71757300  |
| H | 2.35705200  | -2.06343500 | -0.42193300 |

TS10(r1):

0 1

|   |             |             |             |
|---|-------------|-------------|-------------|
| C | -1.65874900 | 1.67031100  | 0.10457100  |
| N | -2.19703500 | 2.68962100  | 0.20754300  |
| C | -0.95030900 | 0.44545000  | -0.02995700 |
| C | -1.62830400 | -0.84032800 | -0.29560800 |
| N | -2.66514300 | -1.02996100 | -1.00341400 |
| C | 0.20397600  | 0.12838500  | 0.84596700  |
| H | 0.50887400  | 0.74977700  | 1.67859600  |
| O | 1.31969300  | 0.58153800  | -0.34638800 |
| C | 2.48831600  | -0.19888800 | -0.68752300 |
| C | 3.74790700  | 0.44217000  | -0.13044500 |
| H | 2.34152900  | -1.21151200 | -0.29623800 |
| H | 2.51579700  | -0.25183500 | -1.77806300 |
| H | 3.71756500  | 0.48740600  | 0.96105400  |
| H | 4.62479000  | -0.14515400 | -0.41927800 |
| H | 3.86971800  | 1.45694300  | -0.51426900 |
| N | 0.24350800  | -1.24921500 | 1.05565800  |
| N | -0.86097100 | -1.85758000 | 0.37080500  |
| H | 0.24318100  | 0.60317100  | -0.88675500 |
| H | 0.24058100  | -1.50514300 | 2.03580300  |
| H | -2.94940800 | -2.00919300 | -1.00568200 |
| H | -0.52970600 | -2.57941600 | -0.26023700 |

TS11(r1):

0 1

|   |             |             |             |
|---|-------------|-------------|-------------|
| C | -0.60905900 | 1.43687600  | -0.17495000 |
| N | -0.01874200 | 2.34389300  | -0.58688700 |
| C | -1.25315100 | 0.30174800  | 0.40893700  |
| C | -2.63231100 | -0.04957400 | 0.02344800  |
| N | -3.46895000 | 0.73217600  | 0.65533500  |
| C | -0.58431200 | -1.00860800 | 0.22226100  |
| H | 0.45389500  | -1.23272600 | 0.42632300  |
| O | 2.38716200  | 0.29997700  | 0.06459200  |
| C | 3.79858000  | 0.34813200  | -0.16121400 |
| C | 4.40366200  | -0.95930400 | 0.31618100  |
| H | 4.00683200  | 0.49431800  | -1.22931200 |
| H | 4.24087100  | 1.19166800  | 0.38503100  |
| H | 3.97692000  | -1.80357800 | -0.23127300 |
| H | 5.48589500  | -0.95893600 | 0.15921100  |
| H | 4.21020700  | -1.10616600 | 1.38178900  |
| N | -1.34859400 | -1.88164500 | -0.34857900 |
| N | -2.60637200 | -1.24983200 | -0.58120300 |
| H | 1.98651500  | 1.12612300  | -0.23389000 |
| H | -2.23848900 | 0.97585700  | 1.27346000  |
| H | -4.46857600 | 0.75541900  | 0.47662500  |
| H | -3.39321700 | -1.86956300 | -0.70332500 |

TS12(r1):

0 1

|   |             |             |             |
|---|-------------|-------------|-------------|
| C | -1.51825200 | 1.79627400  | -0.21978900 |
| N | -1.90903200 | 2.87740600  | -0.08267700 |
| C | -1.10476700 | 0.45629000  | -0.35858600 |
| C | -1.75813900 | -0.64408800 | 0.21844700  |
| N | -2.92837400 | -0.67184900 | 0.90030800  |
| C | 0.02944400  | -0.06653900 | -1.00754200 |
| H | 0.71518400  | 0.44034400  | -1.65969800 |
| O | 1.77707700  | -0.46728900 | 0.20018100  |
| C | 2.82442900  | 0.12230000  | 0.89912900  |
| C | 3.98900800  | 0.56484400  | 0.00467000  |
| H | 2.46279700  | 0.99692000  | 1.47136600  |
| H | 3.21020400  | -0.58353000 | 1.65821100  |
| H | 3.65533600  | 1.31280300  | -0.72205400 |
| H | 4.80162100  | 1.00449100  | 0.59527800  |
| H | 4.38896400  | -0.28990900 | -0.54954800 |
| N | -0.00679800 | -1.44295800 | -0.97132000 |
| N | -1.05239300 | -1.75664700 | -0.07674900 |
| H | 0.94381200  | -1.67312000 | -0.53630800 |
| H | -3.31187200 | 0.21913200  | 1.18086500  |
| H | -3.10543400 | -1.43525300 | 1.53499600  |
| H | -1.47138200 | -2.66971500 | -0.17946200 |

TS13(r1):

0 1

|   |             |             |             |
|---|-------------|-------------|-------------|
| C | -1.81685100 | 1.54605400  | 0.11106300  |
| N | -2.57541100 | 2.41842600  | 0.10828900  |
| C | -0.89576000 | 0.45204100  | 0.04711700  |
| C | -1.38488900 | -0.91916700 | -0.27883700 |
| N | -2.28442300 | -1.17935100 | -1.26541700 |
| C | 0.08209500  | 0.15998300  | 1.13174200  |
| H | 0.48363600  | 0.83841000  | 1.86557600  |
| O | 1.45644100  | 0.67124700  | -0.25336700 |
| C | 2.52675500  | -0.15919300 | -0.62685800 |
| C | 3.88389700  | 0.47276700  | -0.32270300 |
| H | 2.44273200  | -1.13188800 | -0.10436300 |
| H | 2.45559800  | -0.39037800 | -1.69958000 |
| H | 3.98195400  | 0.68217500  | 0.74644800  |
| H | 4.70186400  | -0.19314800 | -0.61884200 |
| H | 3.99227200  | 1.41677900  | -0.86237000 |
| N | 0.03629700  | -1.15307800 | 1.31330600  |
| N | -0.78408300 | -1.84680700 | 0.40677100  |
| H | 0.10980700  | 0.67037700  | -0.67666600 |
| H | 0.63586900  | -1.70171600 | 1.90865900  |
| H | -2.66461600 | -2.11304000 | -1.30167700 |
| H | -2.90878500 | -0.43677500 | -1.54004400 |

TS14(r1):

0 1

|   |             |             |             |
|---|-------------|-------------|-------------|
| C | 0.50203800  | 1.61387000  | -0.08185600 |
| N | -0.07414600 | 2.61831800  | -0.06791200 |
| C | 1.15929400  | 0.36833800  | -0.11093900 |
| C | 2.56738800  | 0.07540400  | -0.04604400 |
| N | 3.75571300  | 0.52590300  | 0.34462900  |
| C | 0.53444000  | -0.87512800 | -0.05817300 |
| H | -0.52691200 | -1.08394500 | -0.05421000 |
| O | -2.41823100 | 0.28466400  | -0.07282200 |
| C | -3.84403900 | 0.31855400  | 0.05907100  |
| C | -4.35352500 | -1.10960900 | 0.11410300  |
| H | -4.12480100 | 0.85752400  | 0.97279000  |
| H | -4.28812300 | 0.84744900  | -0.79383400 |
| H | -3.92638500 | -1.63881600 | 0.96987100  |
| H | -5.44240500 | -1.12205700 | 0.21213600  |
| H | -4.08533600 | -1.65009700 | -0.79738900 |
| N | 1.47399000  | -1.83996200 | 0.00969700  |
| N | 2.72303400  | -1.26604400 | -0.17526400 |
| H | -2.07755300 | 1.18790600  | -0.08867100 |
| H | 1.33594800  | -2.80960100 | -0.23117900 |
| H | 4.06210400  | 1.45600400  | 0.08208700  |
| H | 3.87558900  | -0.93775600 | 0.27595300  |

TS15(r1):

0 1

|   |             |             |             |
|---|-------------|-------------|-------------|
| C | 0.56113300  | 1.49709100  | -0.04654500 |
| N | 0.06968100  | 2.54516100  | -0.05337300 |
| C | 1.16107200  | 0.21848900  | -0.03463400 |
| C | 2.54362500  | -0.07054100 | 0.01438800  |
| N | 3.58506000  | 0.80191900  | 0.15746000  |
| C | 0.51654200  | -1.02288300 | -0.03960100 |
| H | -0.55028700 | -1.19862200 | -0.01755500 |
| O | -2.43589100 | 0.36952000  | 0.07824900  |
| C | -3.86294800 | 0.38754900  | -0.03808900 |
| C | -4.36542000 | -1.04168100 | 0.04727600  |
| H | -4.29969300 | 0.99184500  | 0.76754200  |
| H | -4.15871600 | 0.83773800  | -0.99460800 |
| H | -4.08330500 | -1.49224100 | 1.00210300  |
| H | -5.45524400 | -1.06835700 | -0.03758400 |
| H | -3.94326700 | -1.64735600 | -0.75858900 |
| N | 1.39800300  | -2.02335900 | -0.11571700 |
| N | 2.74599500  | -1.39800500 | -0.08239400 |
| H | -2.10039300 | 1.27283600  | 0.03960700  |
| H | 3.41623200  | 1.77362000  | -0.05274100 |
| H | 4.49851700  | 0.45731900  | -0.09541700 |
| H | 2.24808600  | -2.17109800 | 0.76264900  |



TS1(r2):

0 1

|   |             |             |             |
|---|-------------|-------------|-------------|
| C | 1.51292500  | 1.93227800  | -0.23728400 |
| N | 2.08869800  | 2.91951100  | -0.40778400 |
| C | 0.76625700  | 0.72791100  | -0.04959500 |
| C | 1.50225200  | -0.44021300 | 0.47533700  |
| N | 2.60302700  | -0.59899700 | 1.03296200  |
| C | -0.55372500 | 0.78326700  | -0.34228100 |
| H | -0.99914900 | 1.70614500  | -0.70352500 |
| O | -1.37799300 | -0.27586200 | -0.23030500 |
| C | -2.79389800 | -0.01218600 | -0.40336500 |
| C | -3.41913300 | 0.56516100  | 0.85424400  |
| H | -2.92240900 | 0.65235700  | -1.26398700 |
| H | -3.22286200 | -0.98257700 | -0.65292400 |
| H | -2.98514400 | 1.53505000  | 1.10893700  |
| H | -4.49212100 | 0.70580400  | 0.69784500  |
| H | -3.28182400 | -0.10955600 | 1.70187200  |
| N | 0.61815300  | -2.48675500 | -0.93213800 |
| N | 0.88540300  | -1.87240100 | 0.33897100  |
| H | 1.48518000  | -2.44556800 | -1.46248400 |
| H | -0.07901900 | -1.92615000 | -1.41756400 |
| H | 0.07263900  | -2.03477800 | 0.93568600  |
| H | 1.99361500  | -1.96064000 | 0.89216300  |

TS2(r2):

0 1

|   |             |             |             |
|---|-------------|-------------|-------------|
| C | 1.06098800  | 1.89988000  | 0.27402800  |
| N | 1.13929000  | 3.05494000  | 0.24099300  |
| C | 0.92428800  | 0.49794200  | 0.38523400  |
| C | 1.75308700  | -0.46423600 | -0.34771600 |
| N | 2.76588200  | -0.26498700 | -1.08738000 |
| C | -0.43189300 | -0.15706900 | 0.55368800  |
| H | -1.00290400 | 0.23420600  | 1.40094600  |
| O | -1.19104000 | -0.32985700 | -0.57358600 |
| C | -2.59138000 | -0.61079800 | -0.36829200 |
| C | -3.41469500 | 0.66532200  | -0.29626800 |
| H | -2.88652900 | -1.22016100 | -1.22378100 |
| H | -2.72152500 | -1.22220000 | 0.53458900  |
| H | -3.27733800 | 1.25521400  | -1.20431500 |
| H | -4.47624100 | 0.42075300  | -0.19706300 |
| H | -3.12957800 | 1.28438900  | 0.55839100  |
| N | 0.27527800  | -1.43056800 | 1.08282300  |
| N | 1.17427000  | -1.76228900 | -0.00475100 |
| H | 0.95621500  | -0.50975200 | 1.60051400  |
| H | -0.29369000 | -2.23243000 | 1.35969000  |
| H | 3.19161800  | -1.13373000 | -1.40934900 |
| H | 1.88289000  | -2.40335000 | 0.34323100  |

TS3(r2):

0 1

|   |             |             |             |
|---|-------------|-------------|-------------|
| C | 1.65294700  | 1.71324300  | 0.36323300  |
| N | 2.33517900  | 2.59292100  | 0.67886200  |
| C | 0.80883900  | 0.63160300  | -0.02778600 |
| C | 1.42922000  | -0.68218600 | -0.25095400 |
| N | 2.66913900  | -0.92069400 | -0.67054500 |
| C | -0.50515300 | 0.91687800  | -0.22963000 |
| H | -0.86232500 | 1.92837800  | -0.04085900 |
| O | -1.38719900 | 0.05398800  | -0.69956600 |
| C | -2.77274800 | 0.47407100  | -0.72381200 |
| C | -3.44904500 | 0.23726500  | 0.61472300  |
| H | -2.81709000 | 1.52685100  | -1.02299000 |
| H | -3.22392400 | -0.12688600 | -1.51296100 |
| H | -2.99785600 | 0.84524000  | 1.40274600  |
| H | -4.50727800 | 0.50357000  | 0.54271100  |
| H | -3.37081900 | -0.81181400 | 0.90437800  |
| N | -0.06668400 | -2.10633500 | 0.94973000  |
| N | 0.89928500  | -1.89799500 | -0.07042200 |
| H | 0.40966200  | -2.39942200 | 1.80234700  |
| H | -0.64842000 | -2.88370100 | 0.65401600  |
| H | 3.11434100  | -0.27069300 | -1.31412200 |
| H | 2.15850200  | -2.16393200 | -0.50674800 |

TS8(r2):

0 1

|   |             |             |             |
|---|-------------|-------------|-------------|
| C | 1.86374300  | 1.44018000  | 0.24573600  |
| N | 2.53266500  | 2.37270400  | 0.08666300  |
| C | 1.06575600  | 0.29059800  | 0.45894300  |
| C | 1.31866800  | -1.00026700 | -0.17883600 |
| N | 2.42874500  | -1.32075600 | -0.90587700 |
| C | -0.45555800 | 0.32505100  | 0.55972200  |
| H | -0.82799200 | 0.94355300  | 1.38408600  |
| O | -1.13059100 | 0.56333300  | -0.61574900 |
| C | -2.50127900 | 0.97874400  | -0.50392000 |
| C | -3.46412300 | -0.16647000 | -0.21870500 |
| H | -2.57917600 | 1.76051600  | 0.26286200  |
| H | -2.72690600 | 1.43384400  | -1.46898900 |
| H | -3.32921300 | -0.57938400 | 0.78555200  |
| H | -4.49484800 | 0.19378700  | -0.28308300 |
| H | -3.33459600 | -0.96961400 | -0.94747800 |
| N | -0.39279800 | -1.11535000 | 1.07137600  |
| N | 0.39138000  | -1.87225400 | 0.14593200  |
| H | 0.61746400  | -0.51109300 | 1.67749700  |
| H | -1.24106200 | -1.60766700 | 1.33701000  |
| H | 2.84479300  | -0.58888500 | -1.46159800 |
| H | 2.43307300  | -2.23913600 | -1.32416900 |

**Solvent phase:**

TS1(r1):

0 1

|   |             |             |             |
|---|-------------|-------------|-------------|
| C | -1.01823100 | -0.53684200 | 1.43761900  |
| N | -0.82536100 | -0.88892800 | 2.52488700  |
| C | -1.25238700 | -0.04477600 | 0.11925400  |
| C | -2.28384500 | -0.69936300 | -0.61432600 |
| N | -3.13666000 | -1.18041400 | -1.23521800 |
| C | -0.00910100 | 0.45791500  | -0.68685500 |
| H | -0.14322100 | 0.26231800  | -1.75502500 |
| O | 1.24052800  | 0.11380700  | -0.22999100 |
| C | 1.70171500  | -1.19170300 | -0.65672600 |
| C | 3.10978200  | -1.38573800 | -0.13652700 |
| H | 1.02420700  | -1.95493400 | -0.26085000 |
| H | 1.66854600  | -1.23122400 | -1.75092400 |
| H | 3.13206300  | -1.34210800 | 0.95452800  |
| H | 3.47980700  | -2.36549700 | -0.44801600 |
| H | 3.78153600  | -0.62206200 | -0.53460700 |
| N | 0.66105500  | 2.68962600  | 0.38183200  |
| N | -0.24339200 | 1.96045800  | -0.44362800 |
| H | 1.61358800  | 2.42829700  | 0.13150500  |
| H | 0.51457900  | 2.39632600  | 1.34384200  |
| H | -1.31530100 | 1.39074100  | 0.10983600  |
| H | -0.35712300 | 2.46554300  | -1.32009900 |

TS2(r1):

0 1

|   |             |             |             |
|---|-------------|-------------|-------------|
| C | 1.21161100  | 1.90219300  | -0.06848500 |
| N | 1.47479700  | 2.94765000  | -0.47981000 |
| C | 0.87542700  | 0.58460100  | 0.44592800  |
| C | 2.00597000  | -0.44673600 | 0.32421100  |
| N | 2.96726800  | -0.90136900 | 0.96352000  |
| C | -0.30679700 | -0.10405900 | -0.33797400 |
| H | -0.39195600 | 0.33576800  | -1.33801600 |
| O | -1.48437200 | 0.01462800  | 0.37575800  |
| C | -2.69645600 | -0.18380400 | -0.39425800 |
| C | -3.87677800 | 0.11981900  | 0.50382400  |
| H | -2.67132200 | 0.48720600  | -1.25986400 |
| H | -2.72856000 | -1.21560600 | -0.75558900 |
| H | -3.84058200 | 1.15188700  | 0.85996100  |
| H | -4.80578400 | -0.01936300 | -0.05449200 |
| H | -3.89334400 | -0.54960000 | 1.36696300  |
| N | 1.51446600  | -1.48565300 | -0.66116400 |
| N | 0.07750100  | -1.54489000 | -0.52501900 |
| H | 1.75439200  | -1.31115800 | -1.64051400 |
| H | 2.44746000  | -1.98429300 | 0.04314800  |
| H | 0.59387100  | 0.67899900  | 1.49740300  |
| H | -0.10528500 | -2.03312400 | 0.35278200  |

TS3(r1):

0 1

|   |             |             |             |
|---|-------------|-------------|-------------|
| C | -1.68411500 | -1.41387800 | -0.80276500 |
| N | -2.11625200 | -2.22904600 | -1.50222100 |
| C | -1.11064800 | -0.44481400 | 0.07778200  |
| C | -1.99684100 | 0.08841100  | 1.06468700  |
| N | -2.67817000 | 0.51678000  | 1.89740800  |
| C | -0.07911900 | 0.49762700  | -0.52991200 |
| H | 0.24927700  | 0.23978300  | -1.53157100 |
| O | 1.12902700  | -0.17081500 | 0.42661700  |
| C | 2.31698200  | -0.71408200 | -0.20591700 |
| C | 3.19382800  | -1.35944600 | 0.85034200  |
| H | 2.01872900  | -1.43894600 | -0.97039100 |
| H | 2.82821300  | 0.11822500  | -0.69454700 |
| H | 2.67248800  | -2.18426000 | 1.34186800  |
| H | 4.09631000  | -1.75852500 | 0.37981700  |
| H | 3.49268800  | -0.63100500 | 1.60709700  |
| N | 0.79330600  | 2.64720200  | -0.90921900 |
| N | -0.22936600 | 1.84089600  | -0.34924500 |
| H | 1.49385400  | 2.86496300  | -0.20359100 |
| H | 0.37417500  | 3.51799200  | -1.21867800 |
| H | 0.10522400  | -0.85392700 | 0.64208100  |
| H | -0.59032100 | 2.13848200  | 0.55261000  |

TS4(r1):

0 1

|   |             |             |             |
|---|-------------|-------------|-------------|
| C | -0.68172100 | -1.59111400 | -0.73310400 |
| N | -0.43266300 | -2.46432100 | -1.44056200 |
| C | -1.03659400 | -0.50531100 | 0.18938600  |
| C | -2.41082300 | -0.68585300 | 0.70325900  |
| N | -3.47713000 | -0.79928000 | 1.12283900  |
| C | -0.90816500 | 0.84701700  | -0.48361900 |
| H | -1.40112300 | 1.03351800  | -1.43096600 |
| O | 1.49272400  | 0.30782200  | -0.16531100 |
| C | 2.63785900  | -0.47307200 | -0.23224300 |
| C | 3.24732700  | -0.77469200 | 1.14667700  |
| H | 2.42102900  | -1.44494200 | -0.72098900 |
| H | 3.42425400  | -0.00025300 | -0.85592700 |
| H | 2.52528900  | -1.30234500 | 1.77858600  |
| H | 4.14579000  | -1.39686900 | 1.05717100  |
| H | 3.52570700  | 0.15506900  | 1.65411300  |
| N | -0.29026300 | 3.08810700  | -0.50143300 |
| N | -0.37343700 | 1.83738300  | 0.13475200  |
| H | 0.59440500  | 3.11404800  | -1.00865800 |
| H | -0.25411800 | 3.79649300  | 0.22679600  |
| H | -0.32652000 | -0.54242300 | 1.02140200  |
| H | 0.33065900  | 1.59005400  | 0.84964800  |

TS5(r1):

0 1

|   |             |             |             |
|---|-------------|-------------|-------------|
| C | 3.03365700  | -1.22038300 | 0.01418100  |
| N | 3.98173900  | -1.88692300 | 0.06426100  |
| C | 1.89863000  | -0.39507000 | -0.01239400 |
| C | 1.85905000  | 1.03743300  | 0.34305200  |
| N | 2.47279200  | 2.11718400  | 0.31224000  |
| C | 0.70105000  | -0.67175200 | -0.63227500 |
| H | 0.43780600  | -1.56514500 | -1.18165300 |
| O | -2.96754400 | 0.15645700  | -0.94025900 |
| C | -3.96360900 | -0.00699900 | 0.09741000  |
| C | -3.52806900 | -1.13284900 | 1.01363800  |
| H | -4.06563500 | 0.93091900  | 0.65274000  |
| H | -4.92564100 | -0.23807400 | -0.36947700 |
| H | -2.56979800 | -0.90641500 | 1.48824700  |
| H | -4.27130600 | -1.27478400 | 1.80215000  |
| H | -3.43162400 | -2.07038300 | 0.46054100  |
| N | -0.18952800 | 0.35284300  | -0.58072500 |
| N | 0.33327700  | 1.33846100  | 0.29769100  |
| H | -3.27966700 | 0.81287300  | -1.57395900 |
| H | -1.21242400 | 0.26010800  | -0.68547600 |
| H | 0.99090700  | 2.40640300  | 0.11955800  |
| H | -0.12448300 | 1.27959700  | 1.21345900  |

TS6(r1):

0 1

|   |             |             |             |
|---|-------------|-------------|-------------|
| C | -1.44100400 | 1.83201900  | 0.18141600  |
| N | -1.40521800 | 2.92007600  | -0.19676800 |
| C | -1.49091300 | 0.46152200  | 0.66184500  |
| C | -2.58067700 | -0.40136900 | 0.02897800  |
| N | -3.49835900 | -0.37465200 | -0.80049100 |
| C | -0.28464000 | -0.40664200 | 0.27106900  |
| H | 0.73506900  | -0.03016700 | 0.21944600  |
| O | 2.70969200  | 0.88191700  | 0.16860600  |
| C | 3.90519300  | 0.32387500  | -0.41078300 |
| C | 4.01914500  | -1.12432400 | 0.02437100  |
| H | 3.85417700  | 0.39373600  | -1.50341900 |
| H | 4.77809400  | 0.89474900  | -0.07470500 |
| H | 3.15632100  | -1.70292800 | -0.31556200 |
| H | 4.92044100  | -1.57276400 | -0.40156300 |
| H | 4.08111100  | -1.19938800 | 1.11317600  |
| N | -0.54711300 | -1.62906900 | -0.01407900 |
| N | -1.97163400 | -1.78763800 | 0.06650400  |
| H | -1.58216100 | 0.46945700  | 1.75518500  |
| H | 2.65220100  | 1.81049800  | -0.08281900 |
| H | -2.86607000 | -1.74871700 | -0.84997600 |
| H | -2.21307400 | -2.38131200 | 0.86385200  |

TS7(r1):

0 1

|   |             |             |             |
|---|-------------|-------------|-------------|
| C | 1.10810000  | 1.80256300  | 0.19938200  |
| N | 0.92117200  | 2.85196500  | -0.23701100 |
| C | 1.36872600  | 0.48183700  | 0.75999900  |
| C | 2.11392500  | -0.47193800 | -0.19802700 |
| N | 3.23811100  | -0.21698900 | -0.71693000 |
| C | 0.12642800  | -0.30319800 | 1.08002200  |
| H | -0.66390900 | -0.02613000 | 1.75250900  |
| O | -1.68622400 | -0.41271100 | -0.34424600 |
| C | -2.87988300 | 0.12705100  | -0.81580000 |
| C | -4.02953800 | 0.07669700  | 0.19861100  |
| H | -2.73207300 | 1.17835600  | -1.12722600 |
| H | -3.20044300 | -0.40163200 | -1.73454600 |
| H | -3.77369300 | 0.64280700  | 1.10026400  |
| H | -4.94948000 | 0.50098700  | -0.22055900 |
| H | -4.23448800 | -0.95752500 | 0.49438500  |
| N | 0.21430500  | -1.50376800 | 0.56766900  |
| N | 1.29354500  | -1.59288000 | -0.33096900 |
| H | 1.96949300  | 0.61218500  | 1.67033200  |
| H | -0.72550600 | -1.80353900 | 0.19373300  |
| H | 3.57439500  | -0.97459500 | -1.31202100 |
| H | 1.70900800  | -2.51559500 | -0.38733500 |

TS8(r1):

0 1

|   |             |             |             |
|---|-------------|-------------|-------------|
| C | 1.22167000  | 1.64122800  | -0.23729300 |
| N | 1.40354300  | 2.66395000  | -0.75728500 |
| C | 1.02471700  | 0.43260300  | 0.48992500  |
| C | 1.83856400  | -0.73419800 | 0.06421900  |
| N | 2.95478400  | -0.72096800 | 0.73624600  |
| C | -0.39024900 | -0.18519900 | 0.41644200  |
| H | -0.61887100 | -0.74162800 | 1.33135400  |
| O | -1.38361500 | 0.73371700  | 0.12208600  |
| C | -2.70706600 | 0.44655900  | 0.62843600  |
| C | -3.47705700 | -0.54991200 | -0.22402400 |
| H | -2.62001700 | 0.09887400  | 1.66339700  |
| H | -3.20903000 | 1.41494900  | 0.63797200  |
| H | -2.99652900 | -1.53034000 | -0.22854600 |
| H | -4.48746900 | -0.66552500 | 0.17903500  |
| H | -3.55939500 | -0.19557900 | -1.25462800 |
| N | -0.25701800 | -1.21785000 | -0.70139900 |
| N | 1.13550000  | -1.59047600 | -0.68496100 |
| H | 2.25819000  | 0.23930600  | 1.35521800  |
| H | -0.42011700 | -0.71945900 | -1.57716600 |
| H | 3.67384800  | -1.43518700 | 0.64316000  |
| H | 1.32717700  | -2.58422600 | -0.70092200 |

TS9(r1):

0 1

|   |             |             |             |
|---|-------------|-------------|-------------|
| C | 1.12621700  | 1.75869900  | -0.11043300 |
| N | 1.26826200  | 2.73635700  | -0.70537000 |
| C | 0.94712500  | 0.52566300  | 0.64684000  |
| C | 1.87491100  | -0.57896800 | 0.18566000  |
| N | 3.00663400  | -1.15771400 | 0.55109100  |
| C | -0.42336500 | -0.21434000 | 0.35000400  |
| H | -0.68074400 | -0.77063000 | 1.25655400  |
| O | -1.43272500 | 0.66094800  | -0.01138600 |
| C | -2.75005300 | 0.38816600  | 0.52517900  |
| C | -3.45055500 | -0.76904900 | -0.16764100 |
| H | -2.66065900 | 0.21245600  | 1.60231600  |
| H | -3.29669100 | 1.31984200  | 0.37749200  |
| H | -2.91611300 | -1.71029700 | -0.01949500 |
| H | -4.45681100 | -0.88171000 | 0.24594600  |
| H | -3.53998300 | -0.58282500 | -1.24065900 |
| N | -0.12255400 | -1.20673000 | -0.72903900 |
| N | 1.30279800  | -1.35269300 | -0.71783400 |
| H | 1.04346600  | 0.74405900  | 1.71033300  |
| H | -0.38244400 | -0.79402900 | -1.62401700 |
| H | 3.80634400  | -0.58508800 | 0.80973300  |
| H | 2.41377700  | -2.03493600 | -0.39670300 |

TS10(r1):

0 1

|   |             |             |             |
|---|-------------|-------------|-------------|
| C | -1.73663800 | 1.60359300  | 0.12144800  |
| N | -2.36879500 | 2.57222600  | 0.21554900  |
| C | -0.95469400 | 0.43709300  | -0.03786200 |
| C | -1.57545600 | -0.88512600 | -0.24588600 |
| N | -2.64321000 | -1.12948600 | -0.90919500 |
| C | 0.29860700  | 0.19043100  | 0.75825600  |
| H | 0.58334900  | 0.81843000  | 1.59352500  |
| O | 1.25713700  | 0.62993200  | -0.43466500 |
| C | 2.47761100  | -0.09626400 | -0.78454800 |
| C | 3.66015600  | 0.44169200  | -0.00312600 |
| H | 2.30500900  | -1.15644600 | -0.59229300 |
| H | 2.59173700  | 0.05901200  | -1.85714800 |
| H | 3.52919000  | 0.29083900  | 1.07087000  |
| H | 4.56547900  | -0.08964100 | -0.30973500 |
| H | 3.80484900  | 1.50698800  | -0.19444300 |
| N | 0.37580100  | -1.19376300 | 1.01134600  |
| N | -0.74808000 | -1.83547800 | 0.39225100  |
| H | 0.17834500  | 0.62083800  | -0.97247500 |
| H | 0.38142700  | -1.39483400 | 2.00508200  |
| H | -2.86390600 | -2.12509000 | -0.89310700 |
| H | -0.46010700 | -2.61254600 | -0.19230100 |

TS11(r1):

|     |             |             |             |
|-----|-------------|-------------|-------------|
| 0 1 |             |             |             |
| C   | 0.44615500  | -0.33702100 | -0.60099500 |
| N   | -0.70818100 | -0.42597400 | -0.61568400 |
| C   | 1.86663400  | -0.23738300 | -0.65970100 |
| C   | 2.54777800  | 0.83545700  | 0.10684700  |
| N   | 2.45744600  | 1.95272900  | -0.55384800 |
| C   | 2.65373300  | -1.41072200 | -0.20899900 |
| H   | 2.57219600  | -2.43004300 | -0.55974200 |
| O   | -3.63733100 | -0.69210800 | -0.40862300 |
| C   | -4.14089400 | 0.39631500  | 0.37316000  |
| C   | -5.64772800 | 0.25816300  | 0.49624000  |
| H   | -3.67982300 | 0.39111300  | 1.36951200  |
| H   | -3.88843300 | 1.35264400  | -0.10340000 |
| H   | -5.91245400 | -0.68250300 | 0.98691400  |
| H   | -6.05706200 | 1.08051600  | 1.08930400  |
| H   | -6.12108400 | 0.27836400  | -0.48931400 |
| N   | 3.45628700  | -1.12517300 | 0.76340900  |
| N   | 3.30554500  | 0.25713800  | 1.05577700  |
| H   | -2.67209100 | -0.60306900 | -0.47596900 |
| H   | 2.03124700  | 0.97274800  | -1.46663700 |
| H   | 2.81981300  | 2.83748900  | -0.20865500 |
| H   | 4.07459100  | 0.69971400  | 1.54007800  |

TS12(r1):

|     |             |             |             |
|-----|-------------|-------------|-------------|
| 0 1 |             |             |             |
| C   | 1.68827200  | 1.75737000  | 0.15774400  |
| N   | 2.10035800  | 2.83437300  | 0.05000000  |
| C   | 1.20600200  | 0.44133900  | 0.27818700  |
| C   | 1.84902500  | -0.73279800 | -0.21158000 |
| N   | 3.03105900  | -0.84717400 | -0.81479700 |
| C   | 0.01510800  | 0.01697100  | 0.86974300  |
| H   | -0.69555900 | 0.59410300  | 1.43187000  |
| O   | -1.89025000 | -0.22416600 | -0.39588500 |
| C   | -2.93187900 | 0.68301800  | -0.32017200 |
| C   | -4.31509700 | 0.01355000  | -0.25952900 |
| H   | -2.84290900 | 1.33289900  | 0.58178500  |
| H   | -2.94037700 | 1.38701100  | -1.17992900 |
| H   | -4.38529800 | -0.64182700 | 0.61514900  |
| H   | -5.11860600 | 0.75787100  | -0.19712000 |
| H   | -4.48365200 | -0.59714700 | -1.15300200 |
| N   | -0.01174200 | -1.34739700 | 0.89170600  |
| N   | 1.04752500  | -1.77360600 | 0.07894900  |
| H   | -0.93304900 | -1.68546500 | 0.58171800  |
| H   | 3.56952800  | -0.02366900 | -1.03315100 |
| H   | 3.37104900  | -1.73209400 | -1.15872300 |
| H   | 1.34189800  | -2.73843600 | 0.15111600  |



TS13(r1):

0 1

|   |             |             |             |
|---|-------------|-------------|-------------|
| C | -1.88645800 | 1.51399600  | 0.06370800  |
| N | -2.65534100 | 2.37583300  | 0.04707700  |
| C | -0.91776700 | 0.45327400  | 0.03324100  |
| C | -1.35117500 | -0.94785400 | -0.30488900 |
| N | -2.16830100 | -1.25349300 | -1.32554200 |
| C | -0.04154300 | 0.19869800  | 1.21185400  |
| H | 0.36251800  | 0.90009900  | 1.92026500  |
| O | 1.52162800  | 0.77280600  | -0.25640900 |
| C | 2.53363800  | -0.13837300 | -0.56445100 |
| C | 3.94085800  | 0.43046200  | -0.35518500 |
| H | 2.42623800  | -1.05096500 | 0.05810100  |
| H | 2.44209600  | -0.48574300 | -1.60871000 |
| H | 4.07858500  | 0.74169300  | 0.68511100  |
| H | 4.70812200  | -0.31517900 | -0.59358000 |
| H | 4.10152700  | 1.30356600  | -0.99524200 |
| N | -0.02859800 | -1.09694100 | 1.38550700  |
| N | -0.76621400 | -1.83879800 | 0.45144400  |
| H | 0.02290700  | 0.70434000  | -0.65277000 |
| H | 0.50662300  | -1.60568000 | 2.07572000  |
| H | -2.46924700 | -2.20786100 | -1.45215300 |
| H | -2.68853300 | -0.53415100 | -1.80055100 |

TS14(r1):

0 1

|   |             |             |             |
|---|-------------|-------------|-------------|
| C | 1.57254200  | 1.88285300  | -0.12012900 |
| N | 1.71702000  | 3.03252900  | -0.13605900 |
| C | 1.41995100  | 0.48455400  | -0.10577800 |
| C | 2.44907200  | -0.51452100 | -0.05431200 |
| N | 3.72630600  | -0.76237200 | 0.27363900  |
| C | 0.21936500  | -0.23042600 | 0.00344700  |
| H | -0.80394400 | 0.12789100  | 0.02904700  |
| O | -2.80630600 | 0.95017100  | 0.06768700  |
| C | -4.06047100 | 0.29163200  | 0.33104200  |
| C | -4.04475600 | -1.06258200 | -0.35113800 |
| H | -4.19757900 | 0.17545000  | 1.41221400  |
| H | -4.88478400 | 0.90378500  | -0.05184100 |
| H | -3.23254400 | -1.68421900 | 0.03470900  |
| H | -4.98859600 | -1.58344900 | -0.17024400 |
| H | -3.91592500 | -0.95258400 | -1.43105200 |
| N | 0.50417500  | -1.53692500 | 0.08428700  |
| N | 1.85638100  | -1.72648600 | -0.10584100 |
| H | -2.82324200 | 1.81952900  | 0.48324400  |
| H | -0.14390000 | -2.30625400 | -0.00638000 |
| H | 4.45437100  | -0.18732400 | -0.13953500 |
| H | 3.02520100  | -2.07047600 | 0.26737000  |

TS15(r1):

0 1

|   |             |             |             |
|---|-------------|-------------|-------------|
| C | -1.50049900 | 1.76989000  | 0.04747600  |
| N | -1.62659500 | 2.92009100  | 0.08450000  |
| C | -1.37294400 | 0.36427000  | 0.00190500  |
| C | -2.42951600 | -0.58155000 | 0.03923800  |
| N | -3.76820300 | -0.34970500 | 0.03663700  |
| C | -0.19765300 | -0.37976000 | -0.12882000 |
| H | 0.81710100  | -0.01334200 | -0.24176600 |
| O | 2.86827700  | 0.85706100  | -0.48428900 |
| C | 4.01702300  | 0.44895500  | 0.28309300  |
| C | 4.16343800  | -1.05586200 | 0.16453600  |
| H | 4.91319100  | 0.95190000  | -0.09760000 |
| H | 3.88476700  | 0.74026400  | 1.33161400  |
| H | 4.30837600  | -1.35111500 | -0.87797000 |
| H | 5.02892400  | -1.39433200 | 0.74008700  |
| H | 3.27635700  | -1.56525600 | 0.54970800  |
| N | -0.44776700 | -1.69217800 | -0.06384800 |
| N | -1.92836700 | -1.83375000 | 0.05081200  |
| H | 2.80151900  | 1.81766500  | -0.44655500 |
| H | -4.09654700 | 0.56356700  | 0.31317600  |
| H | -4.36842800 | -1.11658400 | 0.30241300  |
| H | -1.19403800 | -2.19612100 | -0.90007500 |

TS1(r2):

0 1

|   |             |             |             |
|---|-------------|-------------|-------------|
| C | 1.65429500  | 1.84744600  | -0.19770500 |
| N | 2.33981400  | 2.77325800  | -0.31194800 |
| C | 0.82174000  | 0.70101700  | -0.05527400 |
| C | 1.48680300  | -0.52944100 | 0.41087700  |
| N | 2.62533400  | -0.75901400 | 0.88351300  |
| C | -0.50260400 | 0.85910300  | -0.32754800 |
| H | -0.88606400 | 1.82523400  | -0.64483800 |
| O | -1.37546800 | -0.13382600 | -0.23724100 |
| C | -2.78975000 | 0.18636200  | -0.43889800 |
| C | -3.44534800 | 0.58830700  | 0.86660200  |
| H | -2.85707800 | 0.97033500  | -1.19615600 |
| H | -3.21644900 | -0.73029000 | -0.84237300 |
| H | -3.00650200 | 1.50439700  | 1.26911400  |
| H | -4.50849500 | 0.77051000  | 0.68955000  |
| H | -3.35232400 | -0.20573400 | 1.61034200  |
| N | 0.36582200  | -2.49183900 | -0.87511200 |
| N | 0.77424100  | -1.88825200 | 0.36003500  |
| H | 1.17269900  | -2.47863200 | -1.49427500 |
| H | -0.36290500 | -1.91544500 | -1.29146000 |
| H | 0.00109900  | -1.97176700 | 1.02187900  |
| H | 1.93246900  | -2.05382200 | 0.83240500  |

TS2(r2):

0 1

|   |             |             |             |
|---|-------------|-------------|-------------|
| C | 1.18268200  | 1.85084900  | 0.26333500  |
| N | 1.39175100  | 2.98933100  | 0.18516300  |
| C | 0.93607900  | 0.46999500  | 0.39954300  |
| C | 1.72336700  | -0.54431800 | -0.31913800 |
| N | 2.76248800  | -0.38457400 | -1.04803500 |
| C | -0.46311000 | -0.11889100 | 0.54968400  |
| H | -1.02486900 | 0.30097800  | 1.38589800  |
| O | -1.19854500 | -0.22461600 | -0.60573900 |
| C | -2.60873000 | -0.52830800 | -0.43407400 |
| C | -3.43704300 | 0.72739500  | -0.22108900 |
| H | -2.89632400 | -1.03614900 | -1.35479300 |
| H | -2.73236500 | -1.23691100 | 0.39080400  |
| H | -3.31957700 | 1.41348600  | -1.06283500 |
| H | -4.49373600 | 0.45745900  | -0.14201400 |
| H | -3.15637700 | 1.25024900  | 0.69677500  |
| N | 0.17620600  | -1.40669800 | 1.07659200  |
| N | 1.07602100  | -1.77862000 | 0.01063600  |
| H | 0.92467900  | -0.45674900 | 1.58299500  |
| H | -0.41841100 | -2.18184900 | 1.36991500  |
| H | 3.15280600  | -1.27914100 | -1.34434300 |
| H | 1.70779500  | -2.51085300 | 0.32346000  |

TS3(r2):

0 1

|   |             |             |             |
|---|-------------|-------------|-------------|
| C | -1.64121300 | -1.71839800 | 0.38251700  |
| N | -2.33655900 | -2.58573100 | 0.70901100  |
| C | -0.79908900 | -0.64109600 | -0.00921500 |
| C | -1.43311200 | 0.65553800  | -0.27753600 |
| N | -2.65604000 | 0.85966100  | -0.77961100 |
| C | 0.52748300  | -0.91729800 | -0.18332800 |
| H | 0.89298900  | -1.92239600 | 0.01735000  |
| O | 1.39723600  | -0.04467200 | -0.63206600 |
| C | 2.79396400  | -0.46875700 | -0.73060900 |
| C | 3.54034100  | -0.18093100 | 0.55634200  |
| H | 2.81443200  | -1.52910900 | -0.99202700 |
| H | 3.18821900  | 0.10728500  | -1.56596400 |
| H | 3.13527300  | -0.75986300 | 1.38977300  |
| H | 4.58998600  | -0.45781000 | 0.42831200  |
| H | 3.49210400  | 0.88065900  | 0.80608600  |
| N | -0.05440200 | 2.12797300  | 1.00630500  |
| N | -0.94792700 | 1.88347600  | -0.07077700 |
| H | -0.59580900 | 2.41305500  | 1.82178600  |
| H | 0.52042600  | 2.92363900  | 0.74664700  |
| H | -3.00242000 | 0.21381900  | -1.48728100 |
| H | -2.17883500 | 2.11609600  | -0.59166700 |

TS8(r2):

0 1

|   |             |             |             |
|---|-------------|-------------|-------------|
| C | 1.87578200  | 1.44053300  | 0.21794500  |
| N | 2.54354800  | 2.37673600  | 0.06601200  |
| C | 1.07711400  | 0.29713200  | 0.44026700  |
| C | 1.31696400  | -1.00646600 | -0.18453300 |
| N | 2.41189500  | -1.34759600 | -0.92840800 |
| C | -0.44713300 | 0.33753800  | 0.57384000  |
| H | -0.80214000 | 0.97234500  | 1.38982800  |
| O | -1.13704200 | 0.54995800  | -0.59815300 |
| C | -2.51530900 | 0.97554800  | -0.47743000 |
| C | -3.48424700 | -0.17699100 | -0.26629800 |
| H | -2.58847000 | 1.71065400  | 0.33143100  |
| H | -2.72482700 | 1.48484100  | -1.41848400 |
| H | -3.34561300 | -0.66083400 | 0.70370500  |
| H | -4.50884300 | 0.20389900  | -0.29891100 |
| H | -3.37390600 | -0.92695500 | -1.05303300 |
| N | -0.36884400 | -1.08728200 | 1.11552000  |
| N | 0.39349700  | -1.86332400 | 0.18842800  |
| H | 0.67864000  | -0.44868800 | 1.66653100  |
| H | -1.20650100 | -1.56710800 | 1.43351400  |
| H | 2.77285500  | -0.64411400 | -1.55721000 |
| H | 2.39543900  | -2.27720600 | -1.32575500 |
